# Supplementary material
Source: PubMed Central journal article supplement (PMC4614909)
Supplement: i1552-5783-56-11-6747-s01.pdf [file i1552-5783-56-11-6747-s01.pdf]

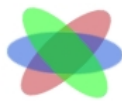

# WEB-based GENE SeT Analysis Toolkit

WebGestalt *Translating gene lists into biological insights...*

**User data and parameters:** User data: `textAreaUpload.txt`, Organism: `hsapiens`, Id Type: `gene_symbol`, Ref Set: `illumina_humanwg_6_v3`, Significance Level: `Top10`, Statistics Test: `Hypergeometric`, MTC: `BH`, Minimum: `2`

The results for the enriched GO category are listed in this table. For each GO category, the first row lists its sub-root (biological process, molecular function, or cellular component), category name, and corresponding GO ID. The second row lists the following statistics:

- C: the number of reference genes in the category
- O: the number of genes in the gene set and also in the category
- E: the expected number in the category
- R: ratio of enrichment
- rawP: p value from hypergeometric test
- adjP: p value adjusted by the multiple test adjustment

Finally, genes in the category are listed. For each gene, the table lists the user uploaded ID and value (optional), Entrez ID, Ensembl Gene Stable ID, Gene symbol, and description. Ensembl Gene Stable ID and Entrez Gene ID are linked to the Ensembl and Entrez Gene databases, respectively.

| Database:biological process                               |          | Name:system development |             | ID:GO:0048731                                                          |                        |                                 |
|-----------------------------------------------------------|----------|-------------------------|-------------|------------------------------------------------------------------------|------------------------|---------------------------------|
| C=3334; O=43; E=21.26; R=2.02; rawP=3.26e-07; adjP=0.0003 |          |                         |             |                                                                        |                        |                                 |
| Index                                                     | UserID   | Value                   | Gene Symbol | Gene Name                                                              | EntrezGene             | Ensembl                         |
| 1 <input type="checkbox"/>                                | DCN      | NA                      | DCN         | decorin                                                                | <a href="#">1634</a>   | <a href="#">ENSG00000011465</a> |
| 2 <input type="checkbox"/>                                | KLF2     | NA                      | KLF2        | Kruppel-like factor 2 (lung)                                           | <a href="#">10365</a>  | <a href="#">ENSG00000127528</a> |
| 3 <input type="checkbox"/>                                | ADAM19   | NA                      | ADAM19      | ADAM metallopeptidase domain 19                                        | <a href="#">8728</a>   | <a href="#">ENSG00000135074</a> |
| 4 <input type="checkbox"/>                                | ID1      | NA                      | ID1         | inhibitor of DNA binding 1, dominant negative helix-loop-helix protein | <a href="#">3397</a>   | <a href="#">ENSG00000125968</a> |
| 5 <input type="checkbox"/>                                | CRYAB    | NA                      | CRYAB       | crystallin, alpha B                                                    | <a href="#">1410</a>   | <a href="#">ENSG00000109846</a> |
| 6 <input type="checkbox"/>                                | MGP      | NA                      | MGP         | matrix Gla protein                                                     | <a href="#">4256</a>   | <a href="#">ENSG00000111341</a> |
| 7 <input type="checkbox"/>                                | LAMC3    | NA                      | LAMC3       | laminin, gamma 3                                                       | <a href="#">10319</a>  | <a href="#">ENSG00000050555</a> |
| 8 <input type="checkbox"/>                                | PPL      | NA                      | PPL         | periplakin                                                             | <a href="#">5493</a>   | <a href="#">ENSG00000118898</a> |
| 9 <input type="checkbox"/>                                | OSR2     | NA                      | OSR2        | odd-skipped related 2 (Drosophila)                                     | <a href="#">116039</a> | <a href="#">ENSG00000164920</a> |
| 10 <input type="checkbox"/>                               | TNFRSF19 | NA                      | TNFRSF19    | tumor necrosis factor receptor superfamily, member 19                  | <a href="#">55504</a>  | <a href="#">ENSG00000127863</a> |
| 11 <input type="checkbox"/>                               | HOXB2    | NA                      | HOXB2       | homeobox B2                                                            | <a href="#">3212</a>   | <a href="#">ENSG00000173917</a> |

| <b>Database:biological process    Name:system development    ID:GO:0048731</b> |         |       |             |                                                                                         |                        |                                 |
|--------------------------------------------------------------------------------|---------|-------|-------------|-----------------------------------------------------------------------------------------|------------------------|---------------------------------|
| C=3334; O=43; E=21.26; R=2.02; rawP=3.26e-07; adjP=0.0003                      |         |       |             |                                                                                         |                        |                                 |
| Index                                                                          | UserID  | Value | Gene Symbol | Gene Name                                                                               | EntrezGene             | Ensembl                         |
| 12 <input type="checkbox"/>                                                    | RAC2    | NA    | RAC2        | ras-related C3 botulinum toxin substrate 2 (rho family, small GTP binding protein Rac2) | <a href="#">5880</a>   | <a href="#">ENSG00000128340</a> |
| 13 <input type="checkbox"/>                                                    | NR0B1   | NA    | NR0B1       | nuclear receptor subfamily 0, group B, member 1                                         | <a href="#">190</a>    | <a href="#">ENSG00000169297</a> |
| 14 <input type="checkbox"/>                                                    | FMOD    | NA    | FMOD        | fibromodulin                                                                            | <a href="#">2331</a>   | <a href="#">ENSG00000122176</a> |
| 15 <input type="checkbox"/>                                                    | TGFBR3  | NA    | TGFBR3      | transforming growth factor, beta receptor III                                           | <a href="#">7049</a>   | <a href="#">ENSG00000069702</a> |
| 16 <input type="checkbox"/>                                                    | TFAP2A  | NA    | TFAP2A      | transcription factor AP-2 alpha (activating enhancer binding protein 2 alpha)           | <a href="#">7020</a>   | <a href="#">ENSG00000137203</a> |
| 17 <input type="checkbox"/>                                                    | GSTM3   | NA    | GSTM3       | glutathione S-transferase mu 3 (brain)                                                  | <a href="#">2947</a>   | <a href="#">ENSG00000134202</a> |
| 18 <input type="checkbox"/>                                                    | ODZ3    | NA    | ODZ3        | odz, odd Oz/ten-m homolog 3 (Drosophila)                                                | <a href="#">55714</a>  | <a href="#">ENSG00000218336</a> |
| 19 <input type="checkbox"/>                                                    | CCND2   | NA    | CCND2       | cyclin D2                                                                               | <a href="#">894</a>    | <a href="#">ENSG00000118971</a> |
| 20 <input type="checkbox"/>                                                    | SCN2A   | NA    | SCN2A       | sodium channel, voltage-gated, type II, alpha subunit                                   | <a href="#">6326</a>   | <a href="#">ENSG00000136531</a> |
| 21 <input type="checkbox"/>                                                    | ALDH3A2 | NA    | ALDH3A2     | aldehyde dehydrogenase 3 family, member A2                                              | <a href="#">224</a>    | <a href="#">ENSG00000072210</a> |
| 22 <input type="checkbox"/>                                                    | STC1    | NA    | STC1        | stanniocalcin 1                                                                         | <a href="#">6781</a>   | <a href="#">ENSG00000159167</a> |
| 23 <input type="checkbox"/>                                                    | LOX     | NA    | LOX         | lysyl oxidase                                                                           | <a href="#">4015</a>   | <a href="#">ENSG00000113083</a> |
| 24 <input type="checkbox"/>                                                    | ZHX2    | NA    | ZHX2        | zinc fingers and homeoboxes 2                                                           | <a href="#">22882</a>  | <a href="#">ENSG00000178764</a> |
| 25 <input type="checkbox"/>                                                    | BDNF    | NA    | BDNF        | brain-derived neurotrophic factor                                                       | <a href="#">627</a>    | <a href="#">ENSG00000176697</a> |
| 26 <input type="checkbox"/>                                                    | GLDN    | NA    | GLDN        | gliomedin                                                                               | <a href="#">342035</a> | <a href="#">ENSG00000186417</a> |
| 27 <input type="checkbox"/>                                                    | FGF2    | NA    | FGF2        |                                                                                         | <a href="#">2247</a>   | <a href="#">ENSG00000138685</a> |

| <b>Database:biological process    Name:system development    ID:GO:0048731</b> |          |       |             |                                                                                               |                       |                                 |
|--------------------------------------------------------------------------------|----------|-------|-------------|-----------------------------------------------------------------------------------------------|-----------------------|---------------------------------|
| C=3334; O=43; E=21.26; R=2.02; rawP=3.26e-07; adjP=0.0003                      |          |       |             |                                                                                               |                       |                                 |
| Index                                                                          | UserID   | Value | Gene Symbol | Gene Name                                                                                     | EntrezGene            | Ensembl                         |
|                                                                                |          |       |             | fibroblast growth factor 2 (basic)                                                            |                       |                                 |
| 28 <input type="checkbox"/>                                                    | MYO10    | NA    | MYO10       | myosin X                                                                                      | <a href="#">4651</a>  | <a href="#">ENSG00000145555</a> |
| 29 <input type="checkbox"/>                                                    | APOD     | NA    | APOD        | apolipoprotein D                                                                              | <a href="#">347</a>   | <a href="#">ENSG00000189058</a> |
| 30 <input type="checkbox"/>                                                    | CRIP2    | NA    | CRIP2       | cysteine-rich protein 2                                                                       | <a href="#">1397</a>  | <a href="#">ENSG00000182809</a> |
| 31 <input type="checkbox"/>                                                    | FEZ1     | NA    | FEZ1        | fasciculation and elongation protein zeta 1 (zygin I)                                         | <a href="#">9638</a>  | <a href="#">ENSG00000149557</a> |
| 32 <input type="checkbox"/>                                                    | EZR      | NA    | EZR         | ezrin                                                                                         | <a href="#">7430</a>  | <a href="#">ENSG00000092820</a> |
| 33 <input type="checkbox"/>                                                    | AKR1C3   | NA    | AKR1C3      | aldo-keto reductase family 1, member C3 (3-alpha hydroxysteroid dehydrogenase, type II)       | <a href="#">8644</a>  | <a href="#">ENSG00000196139</a> |
| 34 <input type="checkbox"/>                                                    | MGST1    | NA    | MGST1       | microsomal glutathione S-transferase 1                                                        | <a href="#">4257</a>  | <a href="#">ENSG00000008394</a> |
| 35 <input type="checkbox"/>                                                    | PALM     | NA    | PALM        | paralemmin                                                                                    | <a href="#">5064</a>  | <a href="#">ENSG00000099864</a> |
| 36 <input type="checkbox"/>                                                    | IL6      | NA    | IL6         | interleukin 6 (interferon, beta 2)                                                            | <a href="#">3569</a>  | <a href="#">ENSG00000136244</a> |
| 37 <input type="checkbox"/>                                                    | TBX18    | NA    | TBX18       | T-box 18                                                                                      | <a href="#">9096</a>  | <a href="#">ENSG00000112837</a> |
| 38 <input type="checkbox"/>                                                    | SVIL     | NA    | SVIL        | supervillin                                                                                   | <a href="#">6840</a>  | <a href="#">ENSG00000197321</a> |
| 39 <input type="checkbox"/>                                                    | OLFM1    | NA    | OLFM1       | olfactomedin 1                                                                                | <a href="#">10439</a> | <a href="#">ENSG00000130558</a> |
| 40 <input type="checkbox"/>                                                    | SERPINE1 | NA    | SERPINE1    | serpin peptidase inhibitor, clade E (nexin, plasminogen activator inhibitor type 1), member 1 | <a href="#">5054</a>  | <a href="#">ENSG00000106366</a> |
| 41 <input type="checkbox"/>                                                    | LAMC2    | NA    | LAMC2       | laminin, gamma 2                                                                              | <a href="#">3918</a>  | <a href="#">ENSG00000058085</a> |
| 42 <input type="checkbox"/>                                                    | PCSK5    | NA    | PCSK5       | proprotein convertase subtilisin/kexin type 5                                                 | <a href="#">5125</a>  | <a href="#">ENSG00000099139</a> |
| 43 <input type="checkbox"/>                                                    | SPRY1    | NA    | SPRY1       | sprouty homolog 1, antagonist of FGF signaling (Drosophila)                                   | <a href="#">10252</a> | <a href="#">ENSG00000164056</a> |

| <b>Database:biological process    Name:system development    ID:GO:0048731</b> |        |       |             |           |            |         |
|--------------------------------------------------------------------------------|--------|-------|-------------|-----------|------------|---------|
| C=3334; O=43; E=21.26; R=2.02; rawP=3.26e-07; adjP=0.0003                      |        |       |             |           |            |         |
| Index                                                                          | UserID | Value | Gene Symbol | Gene Name | EntrezGene | Ensembl |

| <b>Database:biological process    Name:multicellular organismal process    ID:GO:0032501</b> |          |       |             |                                                                                         |                        |                                  |
|----------------------------------------------------------------------------------------------|----------|-------|-------------|-----------------------------------------------------------------------------------------|------------------------|----------------------------------|
| C=5281; O=56; E=33.68; R=1.66; rawP=8.28e-07; adjP=0.0003                                    |          |       |             |                                                                                         |                        |                                  |
| Index                                                                                        | UserID   | Value | Gene Symbol | Gene Name                                                                               | EntrezGene             | Ensembl                          |
| 1 <input type="checkbox"/>                                                                   | DCN      | NA    | DCN         | decorin                                                                                 | <a href="#">1634</a>   | <a href="#">ENSG00000011465</a>  |
| 2 <input type="checkbox"/>                                                                   | KLF2     | NA    | KLF2        | Kruppel-like factor 2 (lung)                                                            | <a href="#">10365</a>  | <a href="#">ENSG000000127528</a> |
| 3 <input type="checkbox"/>                                                                   | PSG5     | NA    | PSG5        | pregnancy specific beta-1-glycoprotein 5                                                | <a href="#">5673</a>   | <a href="#">ENSG000000204941</a> |
| 4 <input type="checkbox"/>                                                                   | ADAM19   | NA    | ADAM19      | ADAM metallopeptidase domain 19                                                         | <a href="#">8728</a>   | <a href="#">ENSG000000135074</a> |
| 5 <input type="checkbox"/>                                                                   | ID1      | NA    | ID1         | inhibitor of DNA binding 1, dominant negative helix-loop-helix protein                  | <a href="#">3397</a>   | <a href="#">ENSG000000125968</a> |
| 6 <input type="checkbox"/>                                                                   | CRYAB    | NA    | CRYAB       | crystallin, alpha B                                                                     | <a href="#">1410</a>   | <a href="#">ENSG000000109846</a> |
| 7 <input type="checkbox"/>                                                                   | MGP      | NA    | MGP         | matrix Gla protein                                                                      | <a href="#">4256</a>   | <a href="#">ENSG000000111341</a> |
| 8 <input type="checkbox"/>                                                                   | LAMC3    | NA    | LAMC3       | laminin, gamma 3                                                                        | <a href="#">10319</a>  | <a href="#">ENSG000000050555</a> |
| 9 <input type="checkbox"/>                                                                   | PPL      | NA    | PPL         | periplakin                                                                              | <a href="#">5493</a>   | <a href="#">ENSG000000118898</a> |
| 10 <input type="checkbox"/>                                                                  | OSR2     | NA    | OSR2        | odd-skipped related 2 (Drosophila)                                                      | <a href="#">116039</a> | <a href="#">ENSG000000164920</a> |
| 11 <input type="checkbox"/>                                                                  | TNFRSF19 | NA    | TNFRSF19    | tumor necrosis factor receptor superfamily, member 19                                   | <a href="#">55504</a>  | <a href="#">ENSG000000127863</a> |
| 12 <input type="checkbox"/>                                                                  | DHRS3    | NA    | DHRS3       | dehydrogenase/reductase (SDR family) member 3                                           | <a href="#">9249</a>   | <a href="#">ENSG000000162496</a> |
| 13 <input type="checkbox"/>                                                                  | PSG3     | NA    | PSG3        | pregnancy specific beta-1-glycoprotein 3                                                | <a href="#">5671</a>   | <a href="#">ENSG000000221826</a> |
| 14 <input type="checkbox"/>                                                                  | HOXB2    | NA    | HOXB2       | homeobox B2                                                                             | <a href="#">3212</a>   | <a href="#">ENSG000000173917</a> |
| 15 <input type="checkbox"/>                                                                  | RAC2     | NA    | RAC2        | ras-related C3 botulinum toxin substrate 2 (rho family, small GTP binding protein Rac2) | <a href="#">5880</a>   | <a href="#">ENSG000000128340</a> |
| 16 <input type="checkbox"/>                                                                  | NROB1    | NA    | NROB1       | nuclear receptor subfamily 0, group B, member 1                                         | <a href="#">190</a>    | <a href="#">ENSG000000169297</a> |
| 17 <input type="checkbox"/>                                                                  | PPAP2A   | NA    | PPAP2A      | phosphatidic acid phosphatase type 2A                                                   | <a href="#">8611</a>   | <a href="#">ENSG000000067113</a> |
|                                                                                              |          |       |             |                                                                                         |                        |                                  |

| Database:biological process                               |         | Name:multicellular organismal process |             |                                                                               | ID:GO:0032501          |                                 |
|-----------------------------------------------------------|---------|---------------------------------------|-------------|-------------------------------------------------------------------------------|------------------------|---------------------------------|
| C=5281; O=56; E=33.68; R=1.66; rawP=8.28e-07; adjP=0.0003 |         |                                       |             |                                                                               |                        |                                 |
| Index                                                     | UserID  | Value                                 | Gene Symbol | Gene Name                                                                     | EntrezGene             | Ensembl                         |
| 18 <input type="checkbox"/>                               | FMOD    | NA                                    | FMOD        | fibromodulin                                                                  | <a href="#">2331</a>   | <a href="#">ENSG00000122176</a> |
| 19 <input type="checkbox"/>                               | TGFBR3  | NA                                    | TGFBR3      | transforming growth factor, beta receptor III                                 | <a href="#">7049</a>   | <a href="#">ENSG00000069702</a> |
| 20 <input type="checkbox"/>                               | TFAP2A  | NA                                    | TFAP2A      | transcription factor AP-2 alpha (activating enhancer binding protein 2 alpha) | <a href="#">7020</a>   | <a href="#">ENSG00000137203</a> |
| 21 <input type="checkbox"/>                               | ZNF521  | NA                                    | ZNF521      | zinc finger protein 521                                                       | <a href="#">25925</a>  | <a href="#">ENSG00000198795</a> |
| 22 <input type="checkbox"/>                               | SGK1    | NA                                    | SGK1        | serum/glucocorticoid regulated kinase 1                                       | <a href="#">6446</a>   | <a href="#">ENSG00000118515</a> |
| 23 <input type="checkbox"/>                               | GSTM3   | NA                                    | GSTM3       | glutathione S-transferase mu 3 (brain)                                        | <a href="#">2947</a>   | <a href="#">ENSG00000134202</a> |
| 24 <input type="checkbox"/>                               | ODZ3    | NA                                    | ODZ3        | odz, odd Oz/ten-m homolog 3 (Drosophila)                                      | <a href="#">55714</a>  | <a href="#">ENSG00000218336</a> |
| 25 <input type="checkbox"/>                               | PROS1   | NA                                    | PROS1       | protein S (alpha)                                                             | <a href="#">5627</a>   | <a href="#">ENSG00000184500</a> |
| 26 <input type="checkbox"/>                               | CCND2   | NA                                    | CCND2       | cyclin D2                                                                     | <a href="#">894</a>    | <a href="#">ENSG00000118971</a> |
| 27 <input type="checkbox"/>                               | SCN2A   | NA                                    | SCN2A       | sodium channel, voltage-gated, type II, alpha subunit                         | <a href="#">6326</a>   | <a href="#">ENSG00000136531</a> |
| 28 <input type="checkbox"/>                               | ALDH3A2 | NA                                    | ALDH3A2     | aldehyde dehydrogenase 3 family, member A2                                    | <a href="#">224</a>    | <a href="#">ENSG00000072210</a> |
| 29 <input type="checkbox"/>                               | STC1    | NA                                    | STC1        | stanniocalcin 1                                                               | <a href="#">6781</a>   | <a href="#">ENSG00000159167</a> |
| 30 <input type="checkbox"/>                               | LOX     | NA                                    | LOX         | lysyl oxidase                                                                 | <a href="#">4015</a>   | <a href="#">ENSG00000113083</a> |
| 31 <input type="checkbox"/>                               | TXNRD1  | NA                                    | TXNRD1      | thioredoxin reductase 1                                                       | <a href="#">7296</a>   | <a href="#">ENSG00000198431</a> |
| 32 <input type="checkbox"/>                               | ZHX2    | NA                                    | ZHX2        | zinc fingers and homeoboxes 2                                                 | <a href="#">22882</a>  | <a href="#">ENSG00000178764</a> |
| 33 <input type="checkbox"/>                               | BDNF    | NA                                    | BDNF        | brain-derived neurotrophic factor                                             | <a href="#">627</a>    | <a href="#">ENSG00000176697</a> |
| 34 <input type="checkbox"/>                               | GLDN    | NA                                    | GLDN        | gliomedin                                                                     | <a href="#">342035</a> | <a href="#">ENSG00000186417</a> |
| 35 <input type="checkbox"/>                               | FGF2    | NA                                    | FGF2        | fibroblast growth factor 2 (basic)                                            | <a href="#">2247</a>   | <a href="#">ENSG00000138685</a> |
| 36 <input type="checkbox"/>                               | MYO10   | NA                                    | MYO10       | myosin X                                                                      | <a href="#">4651</a>   | <a href="#">ENSG00000145555</a> |
| 37 <input type="checkbox"/>                               | CREG1   | NA                                    | CREG1       | cellular repressor of E1A-stimulated genes 1                                  | <a href="#">8804</a>   | <a href="#">ENSG00000143162</a> |
| 38 <input type="checkbox"/>                               | APOD    | NA                                    | APOD        | apolipoprotein D                                                              | <a href="#">347</a>    | <a href="#">ENSG00000189058</a> |
| 39 <input type="checkbox"/>                               | CRIP2   | NA                                    | CRIP2       | cysteine-rich protein 2                                                       | <a href="#">1397</a>   | <a href="#">ENSG00000182809</a> |
|                                                           |         |                                       |             |                                                                               |                        |                                 |

| Database:biological process                               |          | Name:multicellular organismal process |             |                                                                                               | ID:GO:0032501         |                                 |
|-----------------------------------------------------------|----------|---------------------------------------|-------------|-----------------------------------------------------------------------------------------------|-----------------------|---------------------------------|
| C=5281; O=56; E=33.68; R=1.66; rawP=8.28e-07; adjP=0.0003 |          |                                       |             |                                                                                               |                       |                                 |
| Index                                                     | UserID   | Value                                 | Gene Symbol | Gene Name                                                                                     | EntrezGene            | Ensembl                         |
| 40 <input type="checkbox"/>                               | FEZ1     | NA                                    | FEZ1        | fasciculation and elongation protein zeta 1 (zygin I)                                         | <a href="#">9638</a>  | <a href="#">ENSG00000149557</a> |
| 41 <input type="checkbox"/>                               | EZR      | NA                                    | EZR         | ezrin                                                                                         | <a href="#">7430</a>  | <a href="#">ENSG00000092820</a> |
| 42 <input type="checkbox"/>                               | PSG9     | NA                                    | PSG9        | pregnancy specific beta-1-glycoprotein 9                                                      | <a href="#">5678</a>  | <a href="#">ENSG00000183668</a> |
| 43 <input type="checkbox"/>                               | AKR1C3   | NA                                    | AKR1C3      | aldo-keto reductase family 1, member C3 (3-alpha hydroxysteroid dehydrogenase, type II)       | <a href="#">8644</a>  | <a href="#">ENSG00000196139</a> |
| 44 <input type="checkbox"/>                               | ISG15    | NA                                    | ISG15       | ISG15 ubiquitin-like modifier                                                                 | <a href="#">9636</a>  | <a href="#">ENSG00000187608</a> |
| 45 <input type="checkbox"/>                               | MGST1    | NA                                    | MGST1       | microsomal glutathione S-transferase 1                                                        | <a href="#">4257</a>  | <a href="#">ENSG00000008394</a> |
| 46 <input type="checkbox"/>                               | PSG6     | NA                                    | PSG6        | pregnancy specific beta-1-glycoprotein 6                                                      | <a href="#">5675</a>  | <a href="#">ENSG00000170848</a> |
| 47 <input type="checkbox"/>                               | GLS      | NA                                    | GLS         | glutaminase                                                                                   | <a href="#">2744</a>  | <a href="#">ENSG00000115419</a> |
| 48 <input type="checkbox"/>                               | PALM     | NA                                    | PALM        | paralemmin                                                                                    | <a href="#">5064</a>  | <a href="#">ENSG00000099864</a> |
| 49 <input type="checkbox"/>                               | IL6      | NA                                    | IL6         | interleukin 6 (interferon, beta 2)                                                            | <a href="#">3569</a>  | <a href="#">ENSG00000136244</a> |
| 50 <input type="checkbox"/>                               | TBX18    | NA                                    | TBX18       | T-box 18                                                                                      | <a href="#">9096</a>  | <a href="#">ENSG00000112837</a> |
| 51 <input type="checkbox"/>                               | SVIL     | NA                                    | SVIL        | supervillin                                                                                   | <a href="#">6840</a>  | <a href="#">ENSG00000197321</a> |
| 52 <input type="checkbox"/>                               | OLFM1    | NA                                    | OLFM1       | olfactomedin 1                                                                                | <a href="#">10439</a> | <a href="#">ENSG00000130558</a> |
| 53 <input type="checkbox"/>                               | SERPINE1 | NA                                    | SERPINE1    | serpin peptidase inhibitor, clade E (nexin, plasminogen activator inhibitor type 1), member 1 | <a href="#">5054</a>  | <a href="#">ENSG00000106366</a> |
| 54 <input type="checkbox"/>                               | LAMC2    | NA                                    | LAMC2       | laminin, gamma 2                                                                              | <a href="#">3918</a>  | <a href="#">ENSG00000058085</a> |
| 55 <input type="checkbox"/>                               | PCSK5    | NA                                    | PCSK5       | proprotein convertase subtilisin/kexin type 5                                                 | <a href="#">5125</a>  | <a href="#">ENSG00000099139</a> |
| 56 <input type="checkbox"/>                               | SPRY1    | NA                                    | SPRY1       | sprouty homolog 1, antagonist of FGF signaling (Drosophila)                                   | <a href="#">10252</a> | <a href="#">ENSG00000164056</a> |

| Database:biological process development                   |          | Name:multicellular organismal ID:GO:0007275 |             |                                                                                         |            |                 |
|-----------------------------------------------------------|----------|---------------------------------------------|-------------|-----------------------------------------------------------------------------------------|------------|-----------------|
| C=3833; O=46; E=24.44; R=1.88; rawP=7.84e-07; adjP=0.0003 |          |                                             |             |                                                                                         |            |                 |
| Index                                                     | UserID   | Value                                       | Gene Symbol | Gene Name                                                                               | EntrezGene | Ensembl         |
| 1 <input type="checkbox"/>                                | DCN      | NA                                          | DCN         | decorin                                                                                 | 1634       | ENSG00000011465 |
| 2 <input type="checkbox"/>                                | KLF2     | NA                                          | KLF2        | Kruppel-like factor 2 (lung)                                                            | 10365      | ENSG00000127528 |
| 3 <input type="checkbox"/>                                | ADAM19   | NA                                          | ADAM19      | ADAM metallopeptidase domain 19                                                         | 8728       | ENSG00000135074 |
| 4 <input type="checkbox"/>                                | ID1      | NA                                          | ID1         | inhibitor of DNA binding 1, dominant negative helix-loop-helix protein                  | 3397       | ENSG00000125968 |
| 5 <input type="checkbox"/>                                | CRYAB    | NA                                          | CRYAB       | crystallin, alpha B                                                                     | 1410       | ENSG00000109846 |
| 6 <input type="checkbox"/>                                | MGP      | NA                                          | MGP         | matrix Gla protein                                                                      | 4256       | ENSG00000111341 |
| 7 <input type="checkbox"/>                                | LAMC3    | NA                                          | LAMC3       | laminin, gamma 3                                                                        | 10319      | ENSG00000050555 |
| 8 <input type="checkbox"/>                                | PPL      | NA                                          | PPL         | periplakin                                                                              | 5493       | ENSG00000118898 |
| 9 <input type="checkbox"/>                                | OSR2     | NA                                          | OSR2        | odd-skipped related 2 (Drosophila)                                                      | 116039     | ENSG00000164920 |
| 10 <input type="checkbox"/>                               | TNFRSF19 | NA                                          | TNFRSF19    | tumor necrosis factor receptor superfamily, member 19                                   | 55504      | ENSG00000127863 |
| 11 <input type="checkbox"/>                               | HOXB2    | NA                                          | HOXB2       | homeobox B2                                                                             | 3212       | ENSG00000173917 |
| 12 <input type="checkbox"/>                               | RAC2     | NA                                          | RAC2        | ras-related C3 botulinum toxin substrate 2 (rho family, small GTP binding protein Rac2) | 5880       | ENSG00000128340 |
| 13 <input type="checkbox"/>                               | NR0B1    | NA                                          | NR0B1       | nuclear receptor subfamily 0, group B, member 1                                         | 190        | ENSG00000169297 |
| 14 <input type="checkbox"/>                               | FMOD     | NA                                          | FMOD        | fibromodulin                                                                            | 2331       | ENSG00000122176 |
| 15 <input type="checkbox"/>                               | TGFBR3   | NA                                          | TGFBR3      | transforming growth factor, beta receptor III                                           | 7049       | ENSG00000069702 |
| 16 <input type="checkbox"/>                               | TFAP2A   | NA                                          | TFAP2A      | transcription factor AP-2 alpha (activating enhancer binding protein 2 alpha)           | 7020       | ENSG00000137203 |

| Database:biological process development                   |         | Name:multicellular organismal ID:GO:0007275 |             |                                                       |                        |                                 |
|-----------------------------------------------------------|---------|---------------------------------------------|-------------|-------------------------------------------------------|------------------------|---------------------------------|
| C=3833; O=46; E=24.44; R=1.88; rawP=7.84e-07; adjP=0.0003 |         |                                             |             |                                                       |                        |                                 |
| Index                                                     | UserID  | Value                                       | Gene Symbol | Gene Name                                             | EntrezGene             | Ensembl                         |
| 17 <input type="checkbox"/>                               | ZNF521  | NA                                          | ZNF521      | zinc finger protein 521                               | <a href="#">25925</a>  | <a href="#">ENSG00000198795</a> |
| 18 <input type="checkbox"/>                               | GSTM3   | NA                                          | GSTM3       | glutathione S-transferase mu 3 (brain)                | <a href="#">2947</a>   | <a href="#">ENSG00000134202</a> |
| 19 <input type="checkbox"/>                               | ODZ3    | NA                                          | ODZ3        | odz, odd Oz/ten-m homolog 3 (Drosophila)              | <a href="#">55714</a>  | <a href="#">ENSG00000218336</a> |
| 20 <input type="checkbox"/>                               | CCND2   | NA                                          | CCND2       | cyclin D2                                             | <a href="#">894</a>    | <a href="#">ENSG00000118971</a> |
| 21 <input type="checkbox"/>                               | SCN2A   | NA                                          | SCN2A       | sodium channel, voltage-gated, type II, alpha subunit | <a href="#">6326</a>   | <a href="#">ENSG00000136531</a> |
| 22 <input type="checkbox"/>                               | ALDH3A2 | NA                                          | ALDH3A2     | aldehyde dehydrogenase 3 family, member A2            | <a href="#">224</a>    | <a href="#">ENSG00000072210</a> |
| 23 <input type="checkbox"/>                               | STC1    | NA                                          | STC1        | stanniocalcin 1                                       | <a href="#">6781</a>   | <a href="#">ENSG00000159167</a> |
| 24 <input type="checkbox"/>                               | LOX     | NA                                          | LOX         | lysyl oxidase                                         | <a href="#">4015</a>   | <a href="#">ENSG00000113083</a> |
| 25 <input type="checkbox"/>                               | TXNRD1  | NA                                          | TXNRD1      | thioredoxin reductase 1                               | <a href="#">7296</a>   | <a href="#">ENSG00000198431</a> |
| 26 <input type="checkbox"/>                               | ZHX2    | NA                                          | ZHX2        | zinc fingers and homeoboxes 2                         | <a href="#">22882</a>  | <a href="#">ENSG00000178764</a> |
| 27 <input type="checkbox"/>                               | BDNF    | NA                                          | BDNF        | brain-derived neurotrophic factor                     | <a href="#">627</a>    | <a href="#">ENSG00000176697</a> |
| 28 <input type="checkbox"/>                               | GLDN    | NA                                          | GLDN        | gliomedin                                             | <a href="#">342035</a> | <a href="#">ENSG00000186417</a> |
| 29 <input type="checkbox"/>                               | FGF2    | NA                                          | FGF2        | fibroblast growth factor 2 (basic)                    | <a href="#">2247</a>   | <a href="#">ENSG00000138685</a> |
| 30 <input type="checkbox"/>                               | MYO10   | NA                                          | MYO10       | myosin X                                              | <a href="#">4651</a>   | <a href="#">ENSG00000145555</a> |
| 31 <input type="checkbox"/>                               | CREG1   | NA                                          | CREG1       | cellular repressor of E1A-stimulated genes 1          | <a href="#">8804</a>   | <a href="#">ENSG00000143162</a> |
| 32 <input type="checkbox"/>                               | APOD    | NA                                          | APOD        | apolipoprotein D                                      | <a href="#">347</a>    | <a href="#">ENSG00000189058</a> |
| 33 <input type="checkbox"/>                               | CRIP2   | NA                                          | CRIP2       | cysteine-rich protein 2                               | <a href="#">1397</a>   | <a href="#">ENSG00000182809</a> |
| 34 <input type="checkbox"/>                               | FEZ1    | NA                                          | FEZ1        | fasciculation and elongation protein zeta 1 (zygin I) | <a href="#">9638</a>   | <a href="#">ENSG00000149557</a> |



|                                                           |          | <b>Database:biological process development</b> |             | <b>Name:multicellular organismal ID:GO:0007275</b>                                            |                       |                                 |
|-----------------------------------------------------------|----------|------------------------------------------------|-------------|-----------------------------------------------------------------------------------------------|-----------------------|---------------------------------|
| C=3833; O=46; E=24.44; R=1.88; rawP=7.84e-07; adjP=0.0003 |          |                                                |             |                                                                                               |                       |                                 |
| Index                                                     | UserID   | Value                                          | Gene Symbol | Gene Name                                                                                     | EntrezGene            | Ensembl                         |
| 35 <input type="checkbox"/>                               | EZR      | NA                                             | EZR         | ezrin                                                                                         | <a href="#">7430</a>  | <a href="#">ENSG00000092820</a> |
| 36 <input type="checkbox"/>                               | AKR1C3   | NA                                             | AKR1C3      | aldo-keto reductase family 1, member C3 (3-alpha hydroxysteroid dehydrogenase, type II)       | <a href="#">8644</a>  | <a href="#">ENSG00000196139</a> |
| 37 <input type="checkbox"/>                               | MGST1    | NA                                             | MGST1       | microsomal glutathione S-transferase 1                                                        | <a href="#">4257</a>  | <a href="#">ENSG00000008394</a> |
| 38 <input type="checkbox"/>                               | PALM     | NA                                             | PALM        | paralemmin                                                                                    | <a href="#">5064</a>  | <a href="#">ENSG00000099864</a> |
| 39 <input type="checkbox"/>                               | IL6      | NA                                             | IL6         | interleukin 6 (interferon, beta 2)                                                            | <a href="#">3569</a>  | <a href="#">ENSG00000136244</a> |
| 40 <input type="checkbox"/>                               | TBX18    | NA                                             | TBX18       | T-box 18                                                                                      | <a href="#">9096</a>  | <a href="#">ENSG00000112837</a> |
| 41 <input type="checkbox"/>                               | SVIL     | NA                                             | SVIL        | supervillin                                                                                   | <a href="#">6840</a>  | <a href="#">ENSG00000197321</a> |
| 42 <input type="checkbox"/>                               | OLFM1    | NA                                             | OLFM1       | olfactomedin 1                                                                                | <a href="#">10439</a> | <a href="#">ENSG00000130558</a> |
| 43 <input type="checkbox"/>                               | SERPINE1 | NA                                             | SERPINE1    | serpin peptidase inhibitor, clade E (nexin, plasminogen activator inhibitor type 1), member 1 | <a href="#">5054</a>  | <a href="#">ENSG00000106366</a> |
| 44 <input type="checkbox"/>                               | LAMC2    | NA                                             | LAMC2       | laminin, gamma 2                                                                              | <a href="#">3918</a>  | <a href="#">ENSG00000058085</a> |
| 45 <input type="checkbox"/>                               | PCSK5    | NA                                             | PCSK5       | proprotein convertase subtilisin/kexin type 5                                                 | <a href="#">5125</a>  | <a href="#">ENSG00000099139</a> |
| 46 <input type="checkbox"/>                               | SPRY1    | NA                                             | SPRY1       | sprouty homolog 1, antagonist of FGF signaling (Drosophila)                                   | <a href="#">10252</a> | <a href="#">ENSG00000164056</a> |

|                                                           |        | <b>Database:biological process development</b> |             | <b>Name:anatomical structure ID:GO:0048856</b> |                       |                                 |
|-----------------------------------------------------------|--------|------------------------------------------------|-------------|------------------------------------------------|-----------------------|---------------------------------|
| C=3809; O=44; E=24.29; R=1.81; rawP=5.41e-06; adjP=0.0013 |        |                                                |             |                                                |                       |                                 |
| Index                                                     | UserID | Value                                          | Gene Symbol | Gene Name                                      | EntrezGene            | Ensembl                         |
| 1 <input type="checkbox"/>                                | DCN    | NA                                             | DCN         | decorin                                        | <a href="#">1634</a>  | <a href="#">ENSG00000011465</a> |
| 2 <input type="checkbox"/>                                | KLF2   | NA                                             | KLF2        |                                                | <a href="#">10365</a> | <a href="#">ENSG00000127528</a> |

| Database:biological process                               |          | Name:anatomical structure |             |                                                                                         |                        |                                 |
|-----------------------------------------------------------|----------|---------------------------|-------------|-----------------------------------------------------------------------------------------|------------------------|---------------------------------|
| development                                               |          | ID:GO:0048856             |             |                                                                                         |                        |                                 |
| C=3809; O=44; E=24.29; R=1.81; rawP=5.41e-06; adjP=0.0013 |          |                           |             |                                                                                         |                        |                                 |
| Index                                                     | UserID   | Value                     | Gene Symbol | Gene Name                                                                               | EntrezGene             | Ensembl                         |
|                                                           |          |                           |             | Kruppel-like factor 2 (lung)                                                            |                        |                                 |
| 3 <input type="checkbox"/>                                | ADAM19   | NA                        | ADAM19      | ADAM metallopeptidase domain 19                                                         | <a href="#">8728</a>   | <a href="#">ENSG00000135074</a> |
| 4 <input type="checkbox"/>                                | ID1      | NA                        | ID1         | inhibitor of DNA binding 1, dominant negative helix-loop-helix protein                  | <a href="#">3397</a>   | <a href="#">ENSG00000125968</a> |
| 5 <input type="checkbox"/>                                | CRYAB    | NA                        | CRYAB       | crystallin, alpha B                                                                     | <a href="#">1410</a>   | <a href="#">ENSG00000109846</a> |
| 6 <input type="checkbox"/>                                | MGP      | NA                        | MGP         | matrix Gla protein                                                                      | <a href="#">4256</a>   | <a href="#">ENSG00000111341</a> |
| 7 <input type="checkbox"/>                                | LAMC3    | NA                        | LAMC3       | laminin, gamma 3                                                                        | <a href="#">10319</a>  | <a href="#">ENSG00000050555</a> |
| 8 <input type="checkbox"/>                                | PPL      | NA                        | PPL         | periplakin                                                                              | <a href="#">5493</a>   | <a href="#">ENSG00000118898</a> |
| 9 <input type="checkbox"/>                                | OSR2     | NA                        | OSR2        | odd-skipped related 2 (Drosophila)                                                      | <a href="#">116039</a> | <a href="#">ENSG00000164920</a> |
| 10 <input type="checkbox"/>                               | TNFRSF19 | NA                        | TNFRSF19    | tumor necrosis factor receptor superfamily, member 19                                   | <a href="#">55504</a>  | <a href="#">ENSG00000127863</a> |
| 11 <input type="checkbox"/>                               | HOXB2    | NA                        | HOXB2       | homeobox B2                                                                             | <a href="#">3212</a>   | <a href="#">ENSG00000173917</a> |
| 12 <input type="checkbox"/>                               | RAC2     | NA                        | RAC2        | ras-related C3 botulinum toxin substrate 2 (rho family, small GTP binding protein Rac2) | <a href="#">5880</a>   | <a href="#">ENSG00000128340</a> |
| 13 <input type="checkbox"/>                               | NROB1    | NA                        | NROB1       | nuclear receptor subfamily 0, group B, member 1                                         | <a href="#">190</a>    | <a href="#">ENSG00000169297</a> |
| 14 <input type="checkbox"/>                               | FMOD     | NA                        | FMOD        | fibromodulin                                                                            | <a href="#">2331</a>   | <a href="#">ENSG00000122176</a> |
| 15 <input type="checkbox"/>                               | TGFBR3   | NA                        | TGFBR3      | transforming growth factor, beta receptor III                                           | <a href="#">7049</a>   | <a href="#">ENSG00000069702</a> |
| 16 <input type="checkbox"/>                               | TFAP2A   | NA                        | TFAP2A      | transcription factor AP-2 alpha (activating enhancer binding protein 2 alpha)           | <a href="#">7020</a>   | <a href="#">ENSG00000137203</a> |
| 17 <input type="checkbox"/>                               | GSTM3    | NA                        | GSTM3       |                                                                                         | <a href="#">2947</a>   | <a href="#">ENSG00000134202</a> |

| Database:biological process development                   |         | Name:anatomical structure ID:GO:0048856 |             |                                                                 |            |                                 |
|-----------------------------------------------------------|---------|-----------------------------------------|-------------|-----------------------------------------------------------------|------------|---------------------------------|
| C=3809; O=44; E=24.29; R=1.81; rawP=5.41e-06; adjP=0.0013 |         |                                         |             |                                                                 |            |                                 |
| Index                                                     | UserID  | Value                                   | Gene Symbol | Gene Name                                                       | EntrezGene | Ensembl                         |
|                                                           |         |                                         |             | glutathione S-transferase mu 3 (brain)                          |            |                                 |
| 18 <input type="checkbox"/>                               | ODZ3    | NA                                      | ODZ3        | odz, odd Oz/ten-m homolog 3 (Drosophila)                        | 55714      | <a href="#">ENSG00000218336</a> |
| 19 <input type="checkbox"/>                               | CCND2   | NA                                      | CCND2       | cyclin D2                                                       | 894        | <a href="#">ENSG00000118971</a> |
| 20 <input type="checkbox"/>                               | SCN2A   | NA                                      | SCN2A       | sodium channel, voltage-gated, type II, alpha subunit           | 6326       | <a href="#">ENSG00000136531</a> |
| 21 <input type="checkbox"/>                               | ALDH3A2 | NA                                      | ALDH3A2     | aldehyde dehydrogenase 3 family, member A2                      | 224        | <a href="#">ENSG00000072210</a> |
| 22 <input type="checkbox"/>                               | STC1    | NA                                      | STC1        | stanniocalcin 1                                                 | 6781       | <a href="#">ENSG00000159167</a> |
| 23 <input type="checkbox"/>                               | LOX     | NA                                      | LOX         | lysyl oxidase                                                   | 4015       | <a href="#">ENSG00000113083</a> |
| 24 <input type="checkbox"/>                               | TXNRD1  | NA                                      | TXNRD1      | thioredoxin reductase 1                                         | 7296       | <a href="#">ENSG00000198431</a> |
| 25 <input type="checkbox"/>                               | ZHX2    | NA                                      | ZHX2        | zinc fingers and homeoboxes 2                                   | 22882      | <a href="#">ENSG00000178764</a> |
| 26 <input type="checkbox"/>                               | BDNF    | NA                                      | BDNF        | brain-derived neurotrophic factor                               | 627        | <a href="#">ENSG00000176697</a> |
| 27 <input type="checkbox"/>                               | GLDN    | NA                                      | GLDN        | gliomedin                                                       | 342035     | <a href="#">ENSG00000186417</a> |
| 28 <input type="checkbox"/>                               | FGF2    | NA                                      | FGF2        | fibroblast growth factor 2 (basic)                              | 2247       | <a href="#">ENSG00000138685</a> |
| 29 <input type="checkbox"/>                               | MYO10   | NA                                      | MYO10       | myosin X                                                        | 4651       | <a href="#">ENSG00000145555</a> |
| 30 <input type="checkbox"/>                               | APOD    | NA                                      | APOD        | apolipoprotein D                                                | 347        | <a href="#">ENSG00000189058</a> |
| 31 <input type="checkbox"/>                               | CRIP2   | NA                                      | CRIP2       | cysteine-rich protein 2                                         | 1397       | <a href="#">ENSG00000182809</a> |
| 32 <input type="checkbox"/>                               | FEZ1    | NA                                      | FEZ1        | fasciculation and elongation protein zeta 1 (zygin I)           | 9638       | <a href="#">ENSG00000149557</a> |
| 33 <input type="checkbox"/>                               | EZR     | NA                                      | EZR         | ezrin                                                           | 7430       | <a href="#">ENSG00000092820</a> |
| 34 <input type="checkbox"/>                               | AKR1C3  | NA                                      | AKR1C3      | aldo-keto reductase family 1, member C3 (3-alpha hydroxysteroid | 8644       | <a href="#">ENSG00000196139</a> |

| <b>Database:biological process</b>                        |          | <b>Name:anatomical structure</b> |             | <b>ID:GO:0048856</b>                                                                          |            |                 |
|-----------------------------------------------------------|----------|----------------------------------|-------------|-----------------------------------------------------------------------------------------------|------------|-----------------|
| C=3809; O=44; E=24.29; R=1.81; rawP=5.41e-06; adjP=0.0013 |          |                                  |             |                                                                                               |            |                 |
| Index                                                     | UserID   | Value                            | Gene Symbol | Gene Name                                                                                     | EntrezGene | Ensembl         |
|                                                           |          |                                  |             | dehydrogenase, type II)                                                                       |            |                 |
| 35 <input type="checkbox"/>                               | MGST1    | NA                               | MGST1       | microsomal glutathione S-transferase 1                                                        | 4257       | ENSG00000008394 |
| 36 <input type="checkbox"/>                               | PALM     | NA                               | PALM        | paralemmin                                                                                    | 5064       | ENSG00000099864 |
| 37 <input type="checkbox"/>                               | IL6      | NA                               | IL6         | interleukin 6 (interferon, beta 2)                                                            | 3569       | ENSG00000136244 |
| 38 <input type="checkbox"/>                               | TBX18    | NA                               | TBX18       | T-box 18                                                                                      | 9096       | ENSG00000112837 |
| 39 <input type="checkbox"/>                               | SVIL     | NA                               | SVIL        | supervillin                                                                                   | 6840       | ENSG00000197321 |
| 40 <input type="checkbox"/>                               | OLFM1    | NA                               | OLFM1       | olfactomedin 1                                                                                | 10439      | ENSG00000130558 |
| 41 <input type="checkbox"/>                               | SERPINE1 | NA                               | SERPINE1    | serpin peptidase inhibitor, clade E (nexin, plasminogen activator inhibitor type 1), member 1 | 5054       | ENSG00000106366 |
| 42 <input type="checkbox"/>                               | LAMC2    | NA                               | LAMC2       | laminin, gamma 2                                                                              | 3918       | ENSG00000058085 |
| 43 <input type="checkbox"/>                               | PCSK5    | NA                               | PCSK5       | proprotein convertase subtilisin/kexin type 5                                                 | 5125       | ENSG00000099139 |
| 44 <input type="checkbox"/>                               | SPRY1    | NA                               | SPRY1       | sprouty homolog 1, antagonist of FGF signaling (Drosophila)                                   | 10252      | ENSG00000164056 |

| <b>Database:biological process</b>                      |         | <b>Name:biological adhesion</b> |             | <b>ID:GO:0022610</b>                           |            |                 |
|---------------------------------------------------------|---------|---------------------------------|-------------|------------------------------------------------|------------|-----------------|
| C=898; O=18; E=5.73; R=3.14; rawP=1.13e-05; adjP=0.0018 |         |                                 |             |                                                |            |                 |
| Index                                                   | UserID  | Value                           | Gene Symbol | Gene Name                                      | EntrezGene | Ensembl         |
| 1 <input type="checkbox"/>                              | TNFAIP6 | NA                              | TNFAIP6     | tumor necrosis factor, alpha-induced protein 6 | 7130       | ENSG00000123610 |
| 2 <input type="checkbox"/>                              | MYO10   | NA                              | MYO10       | myosin X                                       | 4651       | ENSG00000145555 |
| 3 <input type="checkbox"/>                              | CLDN23  | NA                              | CLDN23      | claudin 23                                     | 137075     | ENSG00000253958 |
| 4 <input type="checkbox"/>                              | APOD    | NA                              | APOD        | apolipoprotein D                               | 347        | ENSG00000189058 |
| 5 <input type="checkbox"/>                              | MGP     | NA                              | MGP         | matrix Gla protein                             | 4256       | ENSG00000111341 |

| <b>Database:biological process      Name:biological adhesion      ID:GO:0022610</b> |          |       |             |                                                                                               |                        |                                 |
|-------------------------------------------------------------------------------------|----------|-------|-------------|-----------------------------------------------------------------------------------------------|------------------------|---------------------------------|
| C=898; O=18; E=5.73; R=3.14; rawP=1.13e-05; adjP=0.0018                             |          |       |             |                                                                                               |                        |                                 |
| Index                                                                               | UserID   | Value | Gene Symbol | Gene Name                                                                                     | EntrezGene             | Ensembl                         |
| 6 <input type="checkbox"/>                                                          | RAPH1    | NA    | RAPH1       | Ras association (RalGDS/AF-6) and pleckstrin homology domains 1                               | <a href="#">65059</a>  | <a href="#">ENSG00000173166</a> |
| 7 <input type="checkbox"/>                                                          | LAMC3    | NA    | LAMC3       | laminin, gamma 3                                                                              | <a href="#">10319</a>  | <a href="#">ENSG00000050555</a> |
| 8 <input type="checkbox"/>                                                          | FEZ1     | NA    | FEZ1        | fasciculation and elongation protein zeta 1 (zygin I)                                         | <a href="#">9638</a>   | <a href="#">ENSG00000149557</a> |
| 9 <input type="checkbox"/>                                                          | EZR      | NA    | EZR         | ezrin                                                                                         | <a href="#">7430</a>   | <a href="#">ENSG00000092820</a> |
| 10 <input type="checkbox"/>                                                         | SMOC2    | NA    | SMOC2       | SPARC related modular calcium binding 2                                                       | <a href="#">64094</a>  | <a href="#">ENSG00000112562</a> |
| 11 <input type="checkbox"/>                                                         | DCBLD2   | NA    | DCBLD2      | discoidin, CUB and LCCL domain containing 2                                                   | <a href="#">131566</a> | <a href="#">ENSG00000057019</a> |
| 12 <input type="checkbox"/>                                                         | EMILIN2  | NA    | EMILIN2     | elastin microfibril interfacier 2                                                             | <a href="#">84034</a>  | <a href="#">ENSG00000132205</a> |
| 13 <input type="checkbox"/>                                                         | CDH10    | NA    | CDH10       | cadherin 10, type 2 (T2-cadherin)                                                             | <a href="#">1008</a>   | <a href="#">ENSG00000040731</a> |
| 14 <input type="checkbox"/>                                                         | TBX18    | NA    | TBX18       | T-box 18                                                                                      | <a href="#">9096</a>   | <a href="#">ENSG00000112837</a> |
| 15 <input type="checkbox"/>                                                         | SERPINE1 | NA    | SERPINE1    | serpin peptidase inhibitor, clade E (nexin, plasminogen activator inhibitor type 1), member 1 | <a href="#">5054</a>   | <a href="#">ENSG00000106366</a> |
| 16 <input type="checkbox"/>                                                         | ODZ3     | NA    | ODZ3        | odz, odd Oz/ten-m homolog 3 (Drosophila)                                                      | <a href="#">55714</a>  | <a href="#">ENSG00000218336</a> |
| 17 <input type="checkbox"/>                                                         | LAMC2    | NA    | LAMC2       | laminin, gamma 2                                                                              | <a href="#">3918</a>   | <a href="#">ENSG00000058085</a> |
| 18 <input type="checkbox"/>                                                         | DPT      | NA    | DPT         | dermatopontin                                                                                 | <a href="#">1805</a>   | <a href="#">ENSG00000143196</a> |

| <b>Database:biological process      Name:cell adhesion      ID:GO:0007155</b> |         |       |             |                                                |                      |                                 |
|-------------------------------------------------------------------------------|---------|-------|-------------|------------------------------------------------|----------------------|---------------------------------|
| C=896; O=18; E=5.71; R=3.15; rawP=1.09e-05; adjP=0.0018                       |         |       |             |                                                |                      |                                 |
| Index                                                                         | UserID  | Value | Gene Symbol | Gene Name                                      | EntrezGene           | Ensembl                         |
| 1 <input type="checkbox"/>                                                    | TNFAIP6 | NA    | TNFAIP6     | tumor necrosis factor, alpha-induced protein 6 | <a href="#">7130</a> | <a href="#">ENSG00000123610</a> |
|                                                                               |         |       |             |                                                |                      |                                 |

| <b>Database:biological process    Name:cell adhesion    ID:GO:0007155</b> |          |       |             |                                                                                               |                        |                                 |
|---------------------------------------------------------------------------|----------|-------|-------------|-----------------------------------------------------------------------------------------------|------------------------|---------------------------------|
| C=896; O=18; E=5.71; R=3.15; rawP=1.09e-05; adjP=0.0018                   |          |       |             |                                                                                               |                        |                                 |
| Index                                                                     | UserID   | Value | Gene Symbol | Gene Name                                                                                     | EntrezGene             | Ensembl                         |
| 2 <input type="checkbox"/>                                                | MYO10    | NA    | MYO10       | myosin X                                                                                      | <a href="#">4651</a>   | <a href="#">ENSG00000145555</a> |
| 3 <input type="checkbox"/>                                                | CLDN23   | NA    | CLDN23      | claudin 23                                                                                    | <a href="#">137075</a> | <a href="#">ENSG00000253958</a> |
| 4 <input type="checkbox"/>                                                | APOD     | NA    | APOD        | apolipoprotein D                                                                              | <a href="#">347</a>    | <a href="#">ENSG00000189058</a> |
| 5 <input type="checkbox"/>                                                | MGP      | NA    | MGP         | matrix Gla protein                                                                            | <a href="#">4256</a>   | <a href="#">ENSG00000111341</a> |
| 6 <input type="checkbox"/>                                                | RAPH1    | NA    | RAPH1       | Ras association (RalGDS/AF-6) and pleckstrin homology domains 1                               | <a href="#">65059</a>  | <a href="#">ENSG00000173166</a> |
| 7 <input type="checkbox"/>                                                | LAMC3    | NA    | LAMC3       | laminin, gamma 3                                                                              | <a href="#">10319</a>  | <a href="#">ENSG00000050555</a> |
| 8 <input type="checkbox"/>                                                | FEZ1     | NA    | FEZ1        | fasciculation and elongation protein zeta 1 (zygin I)                                         | <a href="#">9638</a>   | <a href="#">ENSG00000149557</a> |
| 9 <input type="checkbox"/>                                                | EZR      | NA    | EZR         | ezrin                                                                                         | <a href="#">7430</a>   | <a href="#">ENSG00000092820</a> |
| 10 <input type="checkbox"/>                                               | SMOC2    | NA    | SMOC2       | SPARC related modular calcium binding 2                                                       | <a href="#">64094</a>  | <a href="#">ENSG00000112562</a> |
| 11 <input type="checkbox"/>                                               | DCBLD2   | NA    | DCBLD2      | discoidin, CUB and LCCL domain containing 2                                                   | <a href="#">131566</a> | <a href="#">ENSG00000057019</a> |
| 12 <input type="checkbox"/>                                               | EMILIN2  | NA    | EMILIN2     | elastin microfibril interfacier 2                                                             | <a href="#">84034</a>  | <a href="#">ENSG00000132205</a> |
| 13 <input type="checkbox"/>                                               | CDH10    | NA    | CDH10       | cadherin 10, type 2 (T2-cadherin)                                                             | <a href="#">1008</a>   | <a href="#">ENSG00000040731</a> |
| 14 <input type="checkbox"/>                                               | TBX18    | NA    | TBX18       | T-box 18                                                                                      | <a href="#">9096</a>   | <a href="#">ENSG00000112837</a> |
| 15 <input type="checkbox"/>                                               | SERPINE1 | NA    | SERPINE1    | serpin peptidase inhibitor, clade E (nexin, plasminogen activator inhibitor type 1), member 1 | <a href="#">5054</a>   | <a href="#">ENSG00000106366</a> |
| 16 <input type="checkbox"/>                                               | ODZ3     | NA    | ODZ3        | odz, odd Oz/ten-m homolog 3 (Drosophila)                                                      | <a href="#">55714</a>  | <a href="#">ENSG00000218336</a> |
| 17 <input type="checkbox"/>                                               | LAMC2    | NA    | LAMC2       | laminin, gamma 2                                                                              | <a href="#">3918</a>   | <a href="#">ENSG00000058085</a> |
| 18 <input type="checkbox"/>                                               | DPT      | NA    | DPT         | dermatopontin                                                                                 | <a href="#">1805</a>   | <a href="#">ENSG00000143196</a> |

| <b>Database:biological process</b>                     |          | <b>Name:response to reactive oxygen species</b> |             | <b>ID:GO:000302</b>                                                                           |                       |                                 |
|--------------------------------------------------------|----------|-------------------------------------------------|-------------|-----------------------------------------------------------------------------------------------|-----------------------|---------------------------------|
| C=129; O=7; E=0.82; R=8.51; rawP=1.78e-05; adjP=0.0021 |          |                                                 |             |                                                                                               |                       |                                 |
| Index                                                  | UserID   | Value                                           | Gene Symbol | Gene Name                                                                                     | EntrezGene            | Ensembl                         |
| 1 <input type="checkbox"/>                             | TXNRD1   | NA                                              | TXNRD1      | thioredoxin reductase 1                                                                       | <a href="#">7296</a>  | <a href="#">ENSG00000198431</a> |
| 2 <input type="checkbox"/>                             | KLF2     | NA                                              | KLF2        | Kruppel-like factor 2 (lung)                                                                  | <a href="#">10365</a> | <a href="#">ENSG00000127528</a> |
| 3 <input type="checkbox"/>                             | SERPINE1 | NA                                              | SERPINE1    | serpin peptidase inhibitor, clade E (nexin, plasminogen activator inhibitor type 1), member 1 | <a href="#">5054</a>  | <a href="#">ENSG00000106366</a> |
| 4 <input type="checkbox"/>                             | AKR1C3   | NA                                              | AKR1C3      | aldo-keto reductase family 1, member C3 (3-alpha hydroxysteroid dehydrogenase, type II)       | <a href="#">8644</a>  | <a href="#">ENSG00000196139</a> |
| 5 <input type="checkbox"/>                             | CRYAB    | NA                                              | CRYAB       | crystallin, alpha B                                                                           | <a href="#">1410</a>  | <a href="#">ENSG00000109846</a> |
| 6 <input type="checkbox"/>                             | IL6      | NA                                              | IL6         | interleukin 6 (interferon, beta 2)                                                            | <a href="#">3569</a>  | <a href="#">ENSG00000136244</a> |
| 7 <input type="checkbox"/>                             | APOD     | NA                                              | APOD        | apolipoprotein D                                                                              | <a href="#">347</a>   | <a href="#">ENSG00000189058</a> |

| <b>Database:biological process</b>                        |        | <b>Name:response to chemical stimulus</b> |             | <b>ID:GO:0042221</b>                                                   |                       |                                 |
|-----------------------------------------------------------|--------|-------------------------------------------|-------------|------------------------------------------------------------------------|-----------------------|---------------------------------|
| C=2557; O=33; E=16.31; R=2.02; rawP=1.96e-05; adjP=0.0021 |        |                                           |             |                                                                        |                       |                                 |
| Index                                                     | UserID | Value                                     | Gene Symbol | Gene Name                                                              | EntrezGene            | Ensembl                         |
| 1 <input type="checkbox"/>                                | DCN    | NA                                        | DCN         | decorin                                                                | <a href="#">1634</a>  | <a href="#">ENSG00000011465</a> |
| 2 <input type="checkbox"/>                                | KLF2   | NA                                        | KLF2        | Kruppel-like factor 2 (lung)                                           | <a href="#">10365</a> | <a href="#">ENSG00000127528</a> |
| 3 <input type="checkbox"/>                                | DNAJB4 | NA                                        | DNAJB4      | DnaJ (Hsp40) homolog, subfamily B, member 4                            | <a href="#">11080</a> | <a href="#">ENSG00000162616</a> |
| 4 <input type="checkbox"/>                                | ID1    | NA                                        | ID1         | inhibitor of DNA binding 1, dominant negative helix-loop-helix protein | <a href="#">3397</a>  | <a href="#">ENSG00000125968</a> |
| 5 <input type="checkbox"/>                                | CRYAB  | NA                                        | CRYAB       | crystallin, alpha B                                                    | <a href="#">1410</a>  | <a href="#">ENSG00000109846</a> |
| 6 <input type="checkbox"/>                                | MGP    | NA                                        | MGP         | matrix Gla protein                                                     | <a href="#">4256</a>  | <a href="#">ENSG00000111341</a> |

| <b>Database:biological process    Name:response to chemical stimulus    ID:GO:0042221</b> |          |       |             |                                                                                                                                            |                       |                                 |
|-------------------------------------------------------------------------------------------|----------|-------|-------------|--------------------------------------------------------------------------------------------------------------------------------------------|-----------------------|---------------------------------|
| C=2557; O=33; E=16.31; R=2.02; rawP=1.96e-05; adjP=0.0021                                 |          |       |             |                                                                                                                                            |                       |                                 |
| Index                                                                                     | UserID   | Value | Gene Symbol | Gene Name                                                                                                                                  | EntrezGene            | Ensembl                         |
| 7 <input type="checkbox"/>                                                                | TNFRSF19 | NA    | TNFRSF19    | tumor necrosis factor receptor superfamily, member 19                                                                                      | <a href="#">55504</a> | <a href="#">ENSG00000127863</a> |
| 8 <input type="checkbox"/>                                                                | RAC2     | NA    | RAC2        | ras-related C3 botulinum toxin substrate 2 (rho family, small GTP binding protein Rac2)                                                    | <a href="#">5880</a>  | <a href="#">ENSG00000128340</a> |
| 9 <input type="checkbox"/>                                                                | NROB1    | NA    | NROB1       | nuclear receptor subfamily 0, group B, member 1                                                                                            | <a href="#">190</a>   | <a href="#">ENSG00000169297</a> |
| 10 <input type="checkbox"/>                                                               | CCL26    | NA    | CCL26       | chemokine (C-C motif) ligand 26                                                                                                            | <a href="#">10344</a> | <a href="#">ENSG00000006606</a> |
| 11 <input type="checkbox"/>                                                               | TGFBR3   | NA    | TGFBR3      | transforming growth factor, beta receptor III                                                                                              | <a href="#">7049</a>  | <a href="#">ENSG00000069702</a> |
| 12 <input type="checkbox"/>                                                               | CCL8     | NA    | CCL8        | chemokine (C-C motif) ligand 8                                                                                                             | <a href="#">6355</a>  | <a href="#">ENSG00000108700</a> |
| 13 <input type="checkbox"/>                                                               | TFAP2A   | NA    | TFAP2A      | transcription factor AP-2 alpha (activating enhancer binding protein 2 alpha)                                                              | <a href="#">7020</a>  | <a href="#">ENSG00000137203</a> |
| 14 <input type="checkbox"/>                                                               | GSTM3    | NA    | GSTM3       | glutathione S-transferase mu 3 (brain)                                                                                                     | <a href="#">2947</a>  | <a href="#">ENSG00000134202</a> |
| 15 <input type="checkbox"/>                                                               | CCND2    | NA    | CCND2       | cyclin D2                                                                                                                                  | <a href="#">894</a>   | <a href="#">ENSG00000118971</a> |
| 16 <input type="checkbox"/>                                                               | STC1     | NA    | STC1        | stanniocalcin 1                                                                                                                            | <a href="#">6781</a>  | <a href="#">ENSG00000159167</a> |
| 17 <input type="checkbox"/>                                                               | AKR1C4   | NA    | AKR1C4      | aldo-keto reductase family 1, member C4 (chlordecone reductase; 3-alpha hydroxysteroid dehydrogenase, type I; dihydrodiol dehydrogenase 4) | <a href="#">1109</a>  | <a href="#">ENSG00000198610</a> |
| 18 <input type="checkbox"/>                                                               | LOX      | NA    | LOX         | lysyl oxidase                                                                                                                              | <a href="#">4015</a>  | <a href="#">ENSG00000113083</a> |
| 19 <input type="checkbox"/>                                                               | TXNRD1   | NA    | TXNRD1      | thioredoxin reductase 1                                                                                                                    | <a href="#">7296</a>  | <a href="#">ENSG00000198431</a> |
| 20 <input type="checkbox"/>                                                               | BDNF     | NA    | BDNF        |                                                                                                                                            | <a href="#">627</a>   | <a href="#">ENSG00000176697</a> |



| <b>Database:biological process    Name:response to chemical stimulus    ID:GO:0042221</b> |          |       |             |                                                                                               |                       |                                 |
|-------------------------------------------------------------------------------------------|----------|-------|-------------|-----------------------------------------------------------------------------------------------|-----------------------|---------------------------------|
| C=2557; O=33; E=16.31; R=2.02; rawP=1.96e-05; adjP=0.0021                                 |          |       |             |                                                                                               |                       |                                 |
| Index                                                                                     | UserID   | Value | Gene Symbol | Gene Name                                                                                     | EntrezGene            | Ensembl                         |
|                                                                                           |          |       |             | brain-derived neurotrophic factor                                                             |                       |                                 |
| 21 <input type="checkbox"/>                                                               | MYO10    | NA    | MYO10       | myosin X                                                                                      | <a href="#">4651</a>  | <a href="#">ENSG00000145555</a> |
| 22 <input type="checkbox"/>                                                               | FGF2     | NA    | FGF2        | fibroblast growth factor 2 (basic)                                                            | <a href="#">2247</a>  | <a href="#">ENSG00000138685</a> |
| 23 <input type="checkbox"/>                                                               | APOD     | NA    | APOD        | apolipoprotein D                                                                              | <a href="#">347</a>   | <a href="#">ENSG00000189058</a> |
| 24 <input type="checkbox"/>                                                               | FEZ1     | NA    | FEZ1        | fasciculation and elongation protein zeta 1 (zygin I)                                         | <a href="#">9638</a>  | <a href="#">ENSG00000149557</a> |
| 25 <input type="checkbox"/>                                                               | EZR      | NA    | EZR         | ezrin                                                                                         | <a href="#">7430</a>  | <a href="#">ENSG00000092820</a> |
| 26 <input type="checkbox"/>                                                               | AKR1C3   | NA    | AKR1C3      | aldo-keto reductase family 1, member C3 (3-alpha hydroxysteroid dehydrogenase, type II)       | <a href="#">8644</a>  | <a href="#">ENSG00000196139</a> |
| 27 <input type="checkbox"/>                                                               | MGST1    | NA    | MGST1       | microsomal glutathione S-transferase 1                                                        | <a href="#">4257</a>  | <a href="#">ENSG00000008394</a> |
| 28 <input type="checkbox"/>                                                               | ISG15    | NA    | ISG15       | ISG15 ubiquitin-like modifier                                                                 | <a href="#">9636</a>  | <a href="#">ENSG00000187608</a> |
| 29 <input type="checkbox"/>                                                               | PLOD2    | NA    | PLOD2       | procollagen-lysine, 2-oxoglutarate 5-dioxygenase 2                                            | <a href="#">5352</a>  | <a href="#">ENSG00000152952</a> |
| 30 <input type="checkbox"/>                                                               | IL6      | NA    | IL6         | interleukin 6 (interferon, beta 2)                                                            | <a href="#">3569</a>  | <a href="#">ENSG00000136244</a> |
| 31 <input type="checkbox"/>                                                               | SERPINE1 | NA    | SERPINE1    | serpin peptidase inhibitor, clade E (nexin, plasminogen activator inhibitor type 1), member 1 | <a href="#">5054</a>  | <a href="#">ENSG00000106366</a> |
| 32 <input type="checkbox"/>                                                               | ALDH1A1  | NA    | ALDH1A1     | aldehyde dehydrogenase 1 family, member A1                                                    | <a href="#">216</a>   | <a href="#">ENSG00000165092</a> |
| 33 <input type="checkbox"/>                                                               | SPRY1    | NA    | SPRY1       | sprouty homolog 1, antagonist of FGF signaling (Drosophila)                                   | <a href="#">10252</a> | <a href="#">ENSG00000164056</a> |

| <b>Database:biological process    Name:regulation of cell proliferation    ID:GO:0042127</b> |         |       |             |                                                                                         |                        |                                 |
|----------------------------------------------------------------------------------------------|---------|-------|-------------|-----------------------------------------------------------------------------------------|------------------------|---------------------------------|
| C=1104; O=20; E=7.04; R=2.84; rawP=1.49e-05; adjP=0.0021                                     |         |       |             |                                                                                         |                        |                                 |
| Index                                                                                        | UserID  | Value | Gene Symbol | Gene Name                                                                               | EntrezGene             | Ensembl                         |
| 1 <input type="checkbox"/>                                                                   | BDNF    | NA    | BDNF        | brain-derived neurotrophic factor                                                       | <a href="#">627</a>    | <a href="#">ENSG00000176697</a> |
| 2 <input type="checkbox"/>                                                                   | FGF2    | NA    | FGF2        | fibroblast growth factor 2 (basic)                                                      | <a href="#">2247</a>   | <a href="#">ENSG00000138685</a> |
| 3 <input type="checkbox"/>                                                                   | APOD    | NA    | APOD        | apolipoprotein D                                                                        | <a href="#">347</a>    | <a href="#">ENSG00000189058</a> |
| 4 <input type="checkbox"/>                                                                   | CRIP2   | NA    | CRIP2       | cysteine-rich protein 2                                                                 | <a href="#">1397</a>   | <a href="#">ENSG00000182809</a> |
| 5 <input type="checkbox"/>                                                                   | OSR2    | NA    | OSR2        | odd-skipped related 2 (Drosophila)                                                      | <a href="#">116039</a> | <a href="#">ENSG00000164920</a> |
| 6 <input type="checkbox"/>                                                                   | AKR1C3  | NA    | AKR1C3      | aldo-keto reductase family 1, member C3 (3-alpha hydroxysteroid dehydrogenase, type II) | <a href="#">8644</a>   | <a href="#">ENSG00000196139</a> |
| 7 <input type="checkbox"/>                                                                   | PPAP2A  | NA    | PPAP2A      | phosphatidic acid phosphatase type 2A                                                   | <a href="#">8611</a>   | <a href="#">ENSG00000067113</a> |
| 8 <input type="checkbox"/>                                                                   | CCL26   | NA    | CCL26       | chemokine (C-C motif) ligand 26                                                         | <a href="#">10344</a>  | <a href="#">ENSG00000006606</a> |
| 9 <input type="checkbox"/>                                                                   | RAC2    | NA    | RAC2        | ras-related C3 botulinum toxin substrate 2 (rho family, small GTP binding protein Rac2) | <a href="#">5880</a>   | <a href="#">ENSG00000128340</a> |
| 10 <input type="checkbox"/>                                                                  | TGFBR3  | NA    | TGFBR3      | transforming growth factor, beta receptor III                                           | <a href="#">7049</a>   | <a href="#">ENSG00000069702</a> |
| 11 <input type="checkbox"/>                                                                  | IL6     | NA    | IL6         | interleukin 6 (interferon, beta 2)                                                      | <a href="#">3569</a>   | <a href="#">ENSG00000136244</a> |
| 12 <input type="checkbox"/>                                                                  | TBX18   | NA    | TBX18       | T-box 18                                                                                | <a href="#">9096</a>   | <a href="#">ENSG00000112837</a> |
| 13 <input type="checkbox"/>                                                                  | TFAP2A  | NA    | TFAP2A      | transcription factor AP-2 alpha (activating enhancer binding protein 2 alpha)           | <a href="#">7020</a>   | <a href="#">ENSG00000137203</a> |
| 14 <input type="checkbox"/>                                                                  | SGK1    | NA    | SGK1        | serum/glucocorticoid regulated kinase 1                                                 | <a href="#">6446</a>   | <a href="#">ENSG00000118515</a> |
| 15 <input type="checkbox"/>                                                                  | RARRES1 | NA    | RARRES1     | retinoic acid receptor responder (tazarotene induced) 1                                 | <a href="#">5918</a>   | <a href="#">ENSG00000118849</a> |

| <b>Database:biological process    Name:regulation of cell proliferation    ID:GO:0042127</b> |          |       |             |                                                                                               |                        |                                 |
|----------------------------------------------------------------------------------------------|----------|-------|-------------|-----------------------------------------------------------------------------------------------|------------------------|---------------------------------|
| C=1104; O=20; E=7.04; R=2.84; rawP=1.49e-05; adjP=0.0021                                     |          |       |             |                                                                                               |                        |                                 |
| Index                                                                                        | UserID   | Value | Gene Symbol | Gene Name                                                                                     | EntrezGene             | Ensembl                         |
| 16 <input type="checkbox"/>                                                                  | SERPINE1 | NA    | SERPINE1    | serpin peptidase inhibitor, clade E (nexin, plasminogen activator inhibitor type 1), member 1 | <a href="#">5054</a>   | <a href="#">ENSG00000106366</a> |
| 17 <input type="checkbox"/>                                                                  | PODN     | NA    | PODN        | podocan                                                                                       | <a href="#">127435</a> | <a href="#">ENSG00000174348</a> |
| 18 <input type="checkbox"/>                                                                  | CCND2    | NA    | CCND2       | cyclin D2                                                                                     | <a href="#">894</a>    | <a href="#">ENSG00000118971</a> |
| 19 <input type="checkbox"/>                                                                  | DPT      | NA    | DPT         | dermatopontin                                                                                 | <a href="#">1805</a>   | <a href="#">ENSG00000143196</a> |
| 20 <input type="checkbox"/>                                                                  | SPRY1    | NA    | SPRY1       | sprouty homolog 1, antagonist of FGF signaling (Drosophila)                                   | <a href="#">10252</a>  | <a href="#">ENSG00000164056</a> |

| <b>Database:biological process    Name:developmental process    ID:GO:0032502</b> |          |       |             |                                                                        |                        |                                 |
|-----------------------------------------------------------------------------------|----------|-------|-------------|------------------------------------------------------------------------|------------------------|---------------------------------|
| C=4286; O=46; E=27.33; R=1.68; rawP=2.22e-05; adjP=0.0022                         |          |       |             |                                                                        |                        |                                 |
| Index                                                                             | UserID   | Value | Gene Symbol | Gene Name                                                              | EntrezGene             | Ensembl                         |
| 1 <input type="checkbox"/>                                                        | DCN      | NA    | DCN         | decorin                                                                | <a href="#">1634</a>   | <a href="#">ENSG00000011465</a> |
| 2 <input type="checkbox"/>                                                        | KLF2     | NA    | KLF2        | Kruppel-like factor 2 (lung)                                           | <a href="#">10365</a>  | <a href="#">ENSG00000127528</a> |
| 3 <input type="checkbox"/>                                                        | ADAM19   | NA    | ADAM19      | ADAM metallopeptidase domain 19                                        | <a href="#">8728</a>   | <a href="#">ENSG00000135074</a> |
| 4 <input type="checkbox"/>                                                        | ID1      | NA    | ID1         | inhibitor of DNA binding 1, dominant negative helix-loop-helix protein | <a href="#">3397</a>   | <a href="#">ENSG00000125968</a> |
| 5 <input type="checkbox"/>                                                        | CRYAB    | NA    | CRYAB       | crystallin, alpha B                                                    | <a href="#">1410</a>   | <a href="#">ENSG00000109846</a> |
| 6 <input type="checkbox"/>                                                        | MGP      | NA    | MGP         | matrix Gla protein                                                     | <a href="#">4256</a>   | <a href="#">ENSG00000111341</a> |
| 7 <input type="checkbox"/>                                                        | LAMC3    | NA    | LAMC3       | laminin, gamma 3                                                       | <a href="#">10319</a>  | <a href="#">ENSG00000050555</a> |
| 8 <input type="checkbox"/>                                                        | PPL      | NA    | PPL         | periplakin                                                             | <a href="#">5493</a>   | <a href="#">ENSG00000118898</a> |
| 9 <input type="checkbox"/>                                                        | OSR2     | NA    | OSR2        | odd-skipped related 2 (Drosophila)                                     | <a href="#">116039</a> | <a href="#">ENSG00000164920</a> |
| 10 <input type="checkbox"/>                                                       | TNFRSF19 | NA    | TNFRSF19    | tumor necrosis factor receptor superfamily, member 19                  | <a href="#">55504</a>  | <a href="#">ENSG00000127863</a> |
| 11 <input type="checkbox"/>                                                       | HOXB2    | NA    | HOXB2       | homeobox B2                                                            | <a href="#">3212</a>   | <a href="#">ENSG00000173917</a> |

| Database:biological process                               |         | Name:developmental process |             | ID:GO:0032502                                                                           |                       |                                 |
|-----------------------------------------------------------|---------|----------------------------|-------------|-----------------------------------------------------------------------------------------|-----------------------|---------------------------------|
| C=4286; O=46; E=27.33; R=1.68; rawP=2.22e-05; adjP=0.0022 |         |                            |             |                                                                                         |                       |                                 |
| Index                                                     | UserID  | Value                      | Gene Symbol | Gene Name                                                                               | EntrezGene            | Ensembl                         |
| 12 <input type="checkbox"/>                               | RAC2    | NA                         | RAC2        | ras-related C3 botulinum toxin substrate 2 (rho family, small GTP binding protein Rac2) | <a href="#">5880</a>  | <a href="#">ENSG00000128340</a> |
| 13 <input type="checkbox"/>                               | NR0B1   | NA                         | NR0B1       | nuclear receptor subfamily 0, group B, member 1                                         | <a href="#">190</a>   | <a href="#">ENSG00000169297</a> |
| 14 <input type="checkbox"/>                               | FMOD    | NA                         | FMOD        | fibromodulin                                                                            | <a href="#">2331</a>  | <a href="#">ENSG00000122176</a> |
| 15 <input type="checkbox"/>                               | TGFBR3  | NA                         | TGFBR3      | transforming growth factor, beta receptor III                                           | <a href="#">7049</a>  | <a href="#">ENSG00000069702</a> |
| 16 <input type="checkbox"/>                               | TFAP2A  | NA                         | TFAP2A      | transcription factor AP-2 alpha (activating enhancer binding protein 2 alpha)           | <a href="#">7020</a>  | <a href="#">ENSG00000137203</a> |
| 17 <input type="checkbox"/>                               | ZNF521  | NA                         | ZNF521      | zinc finger protein 521                                                                 | <a href="#">25925</a> | <a href="#">ENSG00000198795</a> |
| 18 <input type="checkbox"/>                               | GSTM3   | NA                         | GSTM3       | glutathione S-transferase mu 3 (brain)                                                  | <a href="#">2947</a>  | <a href="#">ENSG00000134202</a> |
| 19 <input type="checkbox"/>                               | ODZ3    | NA                         | ODZ3        | odz, odd Oz/ten-m homolog 3 (Drosophila)                                                | <a href="#">55714</a> | <a href="#">ENSG00000218336</a> |
| 20 <input type="checkbox"/>                               | CCND2   | NA                         | CCND2       | cyclin D2                                                                               | <a href="#">894</a>   | <a href="#">ENSG00000118971</a> |
| 21 <input type="checkbox"/>                               | SCN2A   | NA                         | SCN2A       | sodium channel, voltage-gated, type II, alpha subunit                                   | <a href="#">6326</a>  | <a href="#">ENSG00000136531</a> |
| 22 <input type="checkbox"/>                               | ALDH3A2 | NA                         | ALDH3A2     | aldehyde dehydrogenase 3 family, member A2                                              | <a href="#">224</a>   | <a href="#">ENSG00000072210</a> |
| 23 <input type="checkbox"/>                               | STC1    | NA                         | STC1        | stanniocalcin 1                                                                         | <a href="#">6781</a>  | <a href="#">ENSG00000159167</a> |
| 24 <input type="checkbox"/>                               | LOX     | NA                         | LOX         | lysyl oxidase                                                                           | <a href="#">4015</a>  | <a href="#">ENSG00000113083</a> |
| 25 <input type="checkbox"/>                               | TXNRD1  | NA                         | TXNRD1      | thioredoxin reductase 1                                                                 | <a href="#">7296</a>  | <a href="#">ENSG00000198431</a> |
| 26 <input type="checkbox"/>                               | ZHX2    | NA                         | ZHX2        | zinc fingers and homeoboxes 2                                                           | <a href="#">22882</a> | <a href="#">ENSG00000178764</a> |
| 27 <input type="checkbox"/>                               | BDNF    | NA                         | BDNF        |                                                                                         | <a href="#">627</a>   | <a href="#">ENSG00000176697</a> |

| Database:biological process                               |          | Name:developmental process |             | ID:GO:0032502                                                                                 |                        |                                 |
|-----------------------------------------------------------|----------|----------------------------|-------------|-----------------------------------------------------------------------------------------------|------------------------|---------------------------------|
| C=4286; O=46; E=27.33; R=1.68; rawP=2.22e-05; adjP=0.0022 |          |                            |             |                                                                                               |                        |                                 |
| Index                                                     | UserID   | Value                      | Gene Symbol | Gene Name                                                                                     | EntrezGene             | Ensembl                         |
|                                                           |          |                            |             | brain-derived neurotrophic factor                                                             |                        |                                 |
| 28 <input type="checkbox"/>                               | GLDN     | NA                         | GLDN        | gliomedin                                                                                     | <a href="#">342035</a> | <a href="#">ENSG00000186417</a> |
| 29 <input type="checkbox"/>                               | FGF2     | NA                         | FGF2        | fibroblast growth factor 2 (basic)                                                            | <a href="#">2247</a>   | <a href="#">ENSG00000138685</a> |
| 30 <input type="checkbox"/>                               | MYO10    | NA                         | MYO10       | myosin X                                                                                      | <a href="#">4651</a>   | <a href="#">ENSG00000145555</a> |
| 31 <input type="checkbox"/>                               | CREG1    | NA                         | CREG1       | cellular repressor of E1A-stimulated genes 1                                                  | <a href="#">8804</a>   | <a href="#">ENSG00000143162</a> |
| 32 <input type="checkbox"/>                               | APOD     | NA                         | APOD        | apolipoprotein D                                                                              | <a href="#">347</a>    | <a href="#">ENSG00000189058</a> |
| 33 <input type="checkbox"/>                               | CRIP2    | NA                         | CRIP2       | cysteine-rich protein 2                                                                       | <a href="#">1397</a>   | <a href="#">ENSG00000182809</a> |
| 34 <input type="checkbox"/>                               | FEZ1     | NA                         | FEZ1        | fasciculation and elongation protein zeta 1 (zygin I)                                         | <a href="#">9638</a>   | <a href="#">ENSG00000149557</a> |
| 35 <input type="checkbox"/>                               | EZR      | NA                         | EZR         | ezrin                                                                                         | <a href="#">7430</a>   | <a href="#">ENSG00000092820</a> |
| 36 <input type="checkbox"/>                               | AKR1C3   | NA                         | AKR1C3      | aldo-keto reductase family 1, member C3 (3-alpha hydroxysteroid dehydrogenase, type II)       | <a href="#">8644</a>   | <a href="#">ENSG00000196139</a> |
| 37 <input type="checkbox"/>                               | MGST1    | NA                         | MGST1       | microsomal glutathione S-transferase 1                                                        | <a href="#">4257</a>   | <a href="#">ENSG00000008394</a> |
| 38 <input type="checkbox"/>                               | PALM     | NA                         | PALM        | paralemmin                                                                                    | <a href="#">5064</a>   | <a href="#">ENSG00000099864</a> |
| 39 <input type="checkbox"/>                               | IL6      | NA                         | IL6         | interleukin 6 (interferon, beta 2)                                                            | <a href="#">3569</a>   | <a href="#">ENSG00000136244</a> |
| 40 <input type="checkbox"/>                               | TBX18    | NA                         | TBX18       | T-box 18                                                                                      | <a href="#">9096</a>   | <a href="#">ENSG00000112837</a> |
| 41 <input type="checkbox"/>                               | SVIL     | NA                         | SVIL        | supervillin                                                                                   | <a href="#">6840</a>   | <a href="#">ENSG00000197321</a> |
| 42 <input type="checkbox"/>                               | OLFM1    | NA                         | OLFM1       | olfactomedin 1                                                                                | <a href="#">10439</a>  | <a href="#">ENSG00000130558</a> |
| 43 <input type="checkbox"/>                               | SERPINE1 | NA                         | SERPINE1    | serpin peptidase inhibitor, clade E (nexin, plasminogen activator inhibitor type 1), member 1 | <a href="#">5054</a>   | <a href="#">ENSG00000106366</a> |
| 44 <input type="checkbox"/>                               | LAMC2    | NA                         | LAMC2       | laminin, gamma 2                                                                              | <a href="#">3918</a>   | <a href="#">ENSG00000058085</a> |

| <b>Database:biological process    Name:developmental process    ID:GO:0032502</b> |        |       |             |                                                             |                       |                                 |
|-----------------------------------------------------------------------------------|--------|-------|-------------|-------------------------------------------------------------|-----------------------|---------------------------------|
| C=4286; O=46; E=27.33; R=1.68; rawP=2.22e-05; adjP=0.0022                         |        |       |             |                                                             |                       |                                 |
| Index                                                                             | UserID | Value | Gene Symbol | Gene Name                                                   | EntrezGene            | Ensembl                         |
| 45 <input type="checkbox"/>                                                       | PCSK5  | NA    | PCSK5       | proprotein convertase subtilisin/kexin type 5               | <a href="#">5125</a>  | <a href="#">ENSG00000099139</a> |
| 46 <input type="checkbox"/>                                                       | SPRY1  | NA    | SPRY1       | sprouty homolog 1, antagonist of FGF signaling (Drosophila) | <a href="#">10252</a> | <a href="#">ENSG00000164056</a> |

| <b>Database:molecular function    Name:retinal dehydrogenase activity    ID:GO:0001758</b> |         |       |             |                                                                                                                                            |                      |                                 |
|--------------------------------------------------------------------------------------------|---------|-------|-------------|--------------------------------------------------------------------------------------------------------------------------------------------|----------------------|---------------------------------|
| C=6; O=3; E=0.03; R=88.78; rawP=3.40e-06; adjP=0.0006                                      |         |       |             |                                                                                                                                            |                      |                                 |
| Index                                                                                      | UserID  | Value | Gene Symbol | Gene Name                                                                                                                                  | EntrezGene           | Ensembl                         |
| 1 <input type="checkbox"/>                                                                 | ALDH1A1 | NA    | ALDH1A1     | aldehyde dehydrogenase 1 family, member A1                                                                                                 | <a href="#">216</a>  | <a href="#">ENSG00000165092</a> |
| 2 <input type="checkbox"/>                                                                 | AKR1C3  | NA    | AKR1C3      | aldo-keto reductase family 1, member C3 (3-alpha hydroxysteroid dehydrogenase, type II)                                                    | <a href="#">8644</a> | <a href="#">ENSG00000196139</a> |
| 3 <input type="checkbox"/>                                                                 | AKR1C4  | NA    | AKR1C4      | aldo-keto reductase family 1, member C4 (chlordecone reductase; 3-alpha hydroxysteroid dehydrogenase, type I; dihydrodiol dehydrogenase 4) | <a href="#">1109</a> | <a href="#">ENSG00000198610</a> |

| <b>Database:molecular function    Name:oxidoreductase activity, acting on the aldehyde or oxo group of donors, NAD or NADP as acceptor    ID:GO:0016620</b> |         |       |             |                                                                 |                      |                                 |
|-------------------------------------------------------------------------------------------------------------------------------------------------------------|---------|-------|-------------|-----------------------------------------------------------------|----------------------|---------------------------------|
| C=29; O=4; E=0.16; R=24.49; rawP=1.99e-05; adjP=0.0016                                                                                                      |         |       |             |                                                                 |                      |                                 |
| Index                                                                                                                                                       | UserID  | Value | Gene Symbol | Gene Name                                                       | EntrezGene           | Ensembl                         |
| 1 <input type="checkbox"/>                                                                                                                                  | ALDH1A1 | NA    | ALDH1A1     | aldehyde dehydrogenase 1 family, member A1                      | <a href="#">216</a>  | <a href="#">ENSG00000165092</a> |
| 2 <input type="checkbox"/>                                                                                                                                  | AKR1C3  | NA    | AKR1C3      | aldo-keto reductase family 1, member C3 (3-alpha hydroxysteroid | <a href="#">8644</a> | <a href="#">ENSG00000196139</a> |

| <b>Database:molecular function      Name:oxidoreductase activity, acting on the aldehyde or oxo group of donors, NAD or NADP as acceptor      ID:GO:0016620</b> |         |       |             |                                                                                                                                            |                      |                                 |
|-----------------------------------------------------------------------------------------------------------------------------------------------------------------|---------|-------|-------------|--------------------------------------------------------------------------------------------------------------------------------------------|----------------------|---------------------------------|
| C=29; O=4; E=0.16; R=24.49; rawP=1.99e-05; adjP=0.0016                                                                                                          |         |       |             |                                                                                                                                            |                      |                                 |
| Index                                                                                                                                                           | UserID  | Value | Gene Symbol | Gene Name                                                                                                                                  | EntrezGene           | Ensembl                         |
|                                                                                                                                                                 |         |       |             | dehydrogenase, type II)                                                                                                                    |                      |                                 |
| 3 <input type="checkbox"/>                                                                                                                                      | ALDH3A2 | NA    | ALDH3A2     | aldehyde dehydrogenase 3 family, member A2                                                                                                 | <a href="#">224</a>  | <a href="#">ENSG00000072210</a> |
| 4 <input type="checkbox"/>                                                                                                                                      | AKR1C4  | NA    | AKR1C4      | aldo-keto reductase family 1, member C4 (chlordecone reductase; 3-alpha hydroxysteroid dehydrogenase, type I; dihydrodiol dehydrogenase 4) | <a href="#">1109</a> | <a href="#">ENSG00000198610</a> |

| <b>Database:molecular function      Name:glycosaminoglycan binding      ID:GO:0005539</b> |         |       |             |                                                |                       |                                 |
|-------------------------------------------------------------------------------------------|---------|-------|-------------|------------------------------------------------|-----------------------|---------------------------------|
| C=164; O=7; E=0.92; R=7.58; rawP=3.75e-05; adjP=0.0021                                    |         |       |             |                                                |                       |                                 |
| Index                                                                                     | UserID  | Value | Gene Symbol | Gene Name                                      | EntrezGene            | Ensembl                         |
| 1 <input type="checkbox"/>                                                                | DCN     | NA    | DCN         | decorin                                        | <a href="#">1634</a>  | <a href="#">ENSG00000011465</a> |
| 2 <input type="checkbox"/>                                                                | TNFAIP6 | NA    | TNFAIP6     | tumor necrosis factor, alpha-induced protein 6 | <a href="#">7130</a>  | <a href="#">ENSG00000123610</a> |
| 3 <input type="checkbox"/>                                                                | TGFBR3  | NA    | TGFBR3      | transforming growth factor, beta receptor III  | <a href="#">7049</a>  | <a href="#">ENSG00000069702</a> |
| 4 <input type="checkbox"/>                                                                | SMOC2   | NA    | SMOC2       | SPARC related modular calcium binding 2        | <a href="#">64094</a> | <a href="#">ENSG00000112562</a> |
| 5 <input type="checkbox"/>                                                                | FGF2    | NA    | FGF2        | fibroblast growth factor 2 (basic)             | <a href="#">2247</a>  | <a href="#">ENSG00000138685</a> |
| 6 <input type="checkbox"/>                                                                | CCL8    | NA    | CCL8        | chemokine (C-C motif) ligand 8                 | <a href="#">6355</a>  | <a href="#">ENSG00000108700</a> |
| 7 <input type="checkbox"/>                                                                | LAMC2   | NA    | LAMC2       | laminin, gamma 2                               | <a href="#">3918</a>  | <a href="#">ENSG00000058085</a> |

| <b>Database:molecular function activity      Name:aldo-keto reductase (NADP)      ID:GO:0004033</b> |        |       |             |                                         |                      |                                 |
|-----------------------------------------------------------------------------------------------------|--------|-------|-------------|-----------------------------------------|----------------------|---------------------------------|
| C=17; O=3; E=0.10; R=31.33; rawP=0.0001; adjP=0.0023                                                |        |       |             |                                         |                      |                                 |
| Index                                                                                               | UserID | Value | Gene Symbol | Gene Name                               | EntrezGene           | Ensembl                         |
| 1 <input type="checkbox"/>                                                                          | AKR1C3 | NA    | AKR1C3      | aldo-keto reductase family 1, member C3 | <a href="#">8644</a> | <a href="#">ENSG00000196139</a> |

| <b>Database:molecular function activity</b>          |        | <b>Name:aldo-keto reductase (NADP) ID:GO:0004033</b> |             |                                                                                                                                            |            |                 |
|------------------------------------------------------|--------|------------------------------------------------------|-------------|--------------------------------------------------------------------------------------------------------------------------------------------|------------|-----------------|
| C=17; O=3; E=0.10; R=31.33; rawP=0.0001; adjP=0.0023 |        |                                                      |             |                                                                                                                                            |            |                 |
| Index                                                | UserID | Value                                                | Gene Symbol | Gene Name                                                                                                                                  | EntrezGene | Ensembl         |
|                                                      |        |                                                      |             | (3-alpha hydroxysteroid dehydrogenase, type II)                                                                                            |            |                 |
| 2 <input type="checkbox"/>                           | DHRS3  | NA                                                   | DHRS3       | dehydrogenase/reductase (SDR family) member 3                                                                                              | 9249       | ENSG00000162496 |
| 3 <input type="checkbox"/>                           | AKR1C4 | NA                                                   | AKR1C4      | aldo-keto reductase family 1, member C4 (chlordecone reductase; 3-alpha hydroxysteroid dehydrogenase, type I; dihydrodiol dehydrogenase 4) | 1109       | ENSG00000198610 |

| <b>Database:molecular function activity</b>            |        | <b>Name:androsterone dehydrogenase ID:GO:0047023</b> |             |                                                                                                                                            |            |                 |
|--------------------------------------------------------|--------|------------------------------------------------------|-------------|--------------------------------------------------------------------------------------------------------------------------------------------|------------|-----------------|
| C=3; O=2; E=0.02; R=118.37; rawP=9.36e-05; adjP=0.0023 |        |                                                      |             |                                                                                                                                            |            |                 |
| Index                                                  | UserID | Value                                                | Gene Symbol | Gene Name                                                                                                                                  | EntrezGene | Ensembl         |
| 1 <input type="checkbox"/>                             | AKR1C3 | NA                                                   | AKR1C3      | aldo-keto reductase family 1, member C3 (3-alpha hydroxysteroid dehydrogenase, type II)                                                    | 8644       | ENSG00000196139 |
| 2 <input type="checkbox"/>                             | AKR1C4 | NA                                                   | AKR1C4      | aldo-keto reductase family 1, member C4 (chlordecone reductase; 3-alpha hydroxysteroid dehydrogenase, type I; dihydrodiol dehydrogenase 4) | 1109       | ENSG00000198610 |

| <b>Database:molecular function binding</b>             |         | <b>Name:carbohydrate derivative ID:GO:0097367</b> |             |                                                |            |                 |
|--------------------------------------------------------|---------|---------------------------------------------------|-------------|------------------------------------------------|------------|-----------------|
| C=178; O=7; E=1.00; R=6.98; rawP=6.31e-05; adjP=0.0023 |         |                                                   |             |                                                |            |                 |
| Index                                                  | UserID  | Value                                             | Gene Symbol | Gene Name                                      | EntrezGene | Ensembl         |
| 1 <input type="checkbox"/>                             | DCN     | NA                                                | DCN         | decorin                                        | 1634       | ENSG00000011465 |
| 2 <input type="checkbox"/>                             | TNFAIP6 | NA                                                | TNFAIP6     | tumor necrosis factor, alpha-induced protein 6 | 7130       | ENSG00000123610 |
| 3 <input type="checkbox"/>                             | TGFBR3  | NA                                                | TGFBR3      | transforming growth factor, beta receptor III  | 7049       | ENSG00000069702 |
| 4 <input type="checkbox"/>                             | SMOC2   | NA                                                | SMOC2       |                                                | 64094      | ENSG00000112562 |



| <b>Database:molecular function      Name:carbohydrate derivative binding      ID:GO:0097367</b> |        |       |             |                                         |                      |                                 |
|-------------------------------------------------------------------------------------------------|--------|-------|-------------|-----------------------------------------|----------------------|---------------------------------|
| C=178; O=7; E=1.00; R=6.98; rawP=6.31e-05; adjP=0.0023                                          |        |       |             |                                         |                      |                                 |
| Index                                                                                           | UserID | Value | Gene Symbol | Gene Name                               | EntrezGene           | Ensembl                         |
|                                                                                                 |        |       |             | SPARC related modular calcium binding 2 |                      |                                 |
| 5 <input type="checkbox"/>                                                                      | FGF2   | NA    | FGF2        | fibroblast growth factor 2 (basic)      | <a href="#">2247</a> | <a href="#">ENSG00000138685</a> |
| 6 <input type="checkbox"/>                                                                      | CCL8   | NA    | CCL8        | chemokine (C-C motif) ligand 8          | <a href="#">6355</a> | <a href="#">ENSG00000108700</a> |
| 7 <input type="checkbox"/>                                                                      | LAMC2  | NA    | LAMC2       | laminin, gamma 2                        | <a href="#">3918</a> | <a href="#">ENSG00000058085</a> |

| <b>Database:molecular function      Name:oxidoreductase activity, acting on the aldehyde or oxo group of donors      ID:GO:0016903</b> |         |       |             |                                                                                                                                            |                      |                                 |
|----------------------------------------------------------------------------------------------------------------------------------------|---------|-------|-------------|--------------------------------------------------------------------------------------------------------------------------------------------|----------------------|---------------------------------|
| C=40; O=4; E=0.23; R=17.76; rawP=7.29e-05; adjP=0.0023                                                                                 |         |       |             |                                                                                                                                            |                      |                                 |
| Index                                                                                                                                  | UserID  | Value | Gene Symbol | Gene Name                                                                                                                                  | EntrezGene           | Ensembl                         |
| 1 <input type="checkbox"/>                                                                                                             | ALDH1A1 | NA    | ALDH1A1     | aldehyde dehydrogenase 1 family, member A1                                                                                                 | <a href="#">216</a>  | <a href="#">ENSG00000165092</a> |
| 2 <input type="checkbox"/>                                                                                                             | AKR1C3  | NA    | AKR1C3      | aldo-keto reductase family 1, member C3 (3-alpha hydroxysteroid dehydrogenase, type II)                                                    | <a href="#">8644</a> | <a href="#">ENSG00000196139</a> |
| 3 <input type="checkbox"/>                                                                                                             | ALDH3A2 | NA    | ALDH3A2     | aldehyde dehydrogenase 3 family, member A2                                                                                                 | <a href="#">224</a>  | <a href="#">ENSG00000072210</a> |
| 4 <input type="checkbox"/>                                                                                                             | AKR1C4  | NA    | AKR1C4      | aldo-keto reductase family 1, member C4 (chlordecone reductase; 3-alpha hydroxysteroid dehydrogenase, type I; dihydrodiol dehydrogenase 4) | <a href="#">1109</a> | <a href="#">ENSG00000198610</a> |

| <b>Database:molecular function      Name:oxidoreductase activity      ID:GO:0016491</b> |        |       |             |                         |                      |                                 |
|-----------------------------------------------------------------------------------------|--------|-------|-------------|-------------------------|----------------------|---------------------------------|
| C=641; O=12; E=3.61; R=3.32; rawP=0.0002; adjP=0.0041                                   |        |       |             |                         |                      |                                 |
| Index                                                                                   | UserID | Value | Gene Symbol | Gene Name               | EntrezGene           | Ensembl                         |
| 1 <input type="checkbox"/>                                                              | TXNRD1 | NA    | TXNRD1      | thioredoxin reductase 1 | <a href="#">7296</a> | <a href="#">ENSG00000198431</a> |
| 2 <input type="checkbox"/>                                                              | PLOD2  | NA    | PLOD2       |                         | <a href="#">5352</a> | <a href="#">ENSG00000152952</a> |

| <b>Database:molecular function</b>                    |         | <b>Name:oxidoreductase activity</b> |             | <b>ID:GO:0016491</b>                                                                                                                                         |                        |                                 |
|-------------------------------------------------------|---------|-------------------------------------|-------------|--------------------------------------------------------------------------------------------------------------------------------------------------------------|------------------------|---------------------------------|
| C=641; O=12; E=3.61; R=3.32; rawP=0.0002; adjP=0.0041 |         |                                     |             |                                                                                                                                                              |                        |                                 |
| Index                                                 | UserID  | Value                               | Gene Symbol | Gene Name                                                                                                                                                    | EntrezGene             | Ensembl                         |
|                                                       |         |                                     |             | procollagen-lysine,<br>2-oxoglutarate<br>5-dioxygenase 2                                                                                                     |                        |                                 |
| 3 <input type="checkbox"/>                            | CREG1   | NA                                  | CREG1       | cellular repressor of E1A-<br>stimulated genes 1                                                                                                             | <a href="#">8804</a>   | <a href="#">ENSG00000143162</a> |
| 4 <input type="checkbox"/>                            | CYGB    | NA                                  | CYGB        | cytoglobin                                                                                                                                                   | <a href="#">114757</a> | <a href="#">ENSG00000161544</a> |
| 5 <input type="checkbox"/>                            | ALDH1A1 | NA                                  | ALDH1A1     | aldehyde dehydrogenase<br>1 family, member A1                                                                                                                | <a href="#">216</a>    | <a href="#">ENSG00000165092</a> |
| 6 <input type="checkbox"/>                            | AKR1C3  | NA                                  | AKR1C3      | aldo-keto reductase<br>family 1, member C3<br>(3-alpha hydroxysteroid<br>dehydrogenase, type II)                                                             | <a href="#">8644</a>   | <a href="#">ENSG00000196139</a> |
| 7 <input type="checkbox"/>                            | DHRS3   | NA                                  | DHRS3       | dehydrogenase/reductase<br>(SDR family) member 3                                                                                                             | <a href="#">9249</a>   | <a href="#">ENSG00000162496</a> |
| 8 <input type="checkbox"/>                            | ALDH3A2 | NA                                  | ALDH3A2     | aldehyde dehydrogenase<br>3 family, member A2                                                                                                                | <a href="#">224</a>    | <a href="#">ENSG00000072210</a> |
| 9 <input type="checkbox"/>                            | MGST1   | NA                                  | MGST1       | microsomal glutathione<br>S-transferase 1                                                                                                                    | <a href="#">4257</a>   | <a href="#">ENSG00000008394</a> |
| 10 <input type="checkbox"/>                           | CH25H   | NA                                  | CH25H       | cholesterol 25-<br>hydroxylase                                                                                                                               | <a href="#">9023</a>   | <a href="#">ENSG00000138135</a> |
| 11 <input type="checkbox"/>                           | AKR1C4  | NA                                  | AKR1C4      | aldo-keto reductase<br>family 1, member C4<br>(chlordecone reductase;<br>3-alpha hydroxysteroid<br>dehydrogenase, type I;<br>dihydrodiol<br>dehydrogenase 4) | <a href="#">1109</a>   | <a href="#">ENSG00000198610</a> |
| 12 <input type="checkbox"/>                           | LOX     | NA                                  | LOX         | lysyl oxidase                                                                                                                                                | <a href="#">4015</a>   | <a href="#">ENSG00000113083</a> |

| <b>Database:molecular function</b>                   |        | <b>Name:heparin binding</b> |             | <b>ID:GO:0008201</b>                                |                       |                                 |
|------------------------------------------------------|--------|-----------------------------|-------------|-----------------------------------------------------|-----------------------|---------------------------------|
| C=122; O=5; E=0.69; R=7.28; rawP=0.0006; adjP=0.0109 |        |                             |             |                                                     |                       |                                 |
| Index                                                | UserID | Value                       | Gene Symbol | Gene Name                                           | EntrezGene            | Ensembl                         |
| 1 <input type="checkbox"/>                           | TGFBR3 | NA                          | TGFBR3      | transforming growth<br>factor, beta receptor<br>III | <a href="#">7049</a>  | <a href="#">ENSG00000069702</a> |
| 2 <input type="checkbox"/>                           | SMOC2  | NA                          | SMOC2       | SPARC related<br>modular calcium<br>binding 2       | <a href="#">64094</a> | <a href="#">ENSG00000112562</a> |
| 3 <input type="checkbox"/>                           | FGF2   | NA                          | FGF2        | fibroblast growth<br>factor 2 (basic)               | <a href="#">2247</a>  | <a href="#">ENSG00000138685</a> |
| 4 <input type="checkbox"/>                           | CCL8   | NA                          | CCL8        |                                                     | <a href="#">6355</a>  | <a href="#">ENSG00000108700</a> |

| <b>Database:molecular function      Name:heparin binding      ID:GO:0008201</b> |        |       |             |                                |                      |                                 |
|---------------------------------------------------------------------------------|--------|-------|-------------|--------------------------------|----------------------|---------------------------------|
| C=122; O=5; E=0.69; R=7.28; rawP=0.0006; adjP=0.0109                            |        |       |             |                                |                      |                                 |
| Index                                                                           | UserID | Value | Gene Symbol | Gene Name                      | EntrezGene           | Ensembl                         |
|                                                                                 |        |       |             | chemokine (C-C motif) ligand 8 |                      |                                 |
| 5 <input type="checkbox"/>                                                      | LAMC2  | NA    | LAMC2       | laminin, gamma 2               | <a href="#">3918</a> | <a href="#">ENSG00000058085</a> |

| <b>Database:molecular function activity      Name:aldehyde dehydrogenase (NAD)      ID:GO:0004029</b> |         |       |             |                                            |                     |                                 |
|-------------------------------------------------------------------------------------------------------|---------|-------|-------------|--------------------------------------------|---------------------|---------------------------------|
| C=10; O=2; E=0.06; R=35.51; rawP=0.0014; adjP=0.0230                                                  |         |       |             |                                            |                     |                                 |
| Index                                                                                                 | UserID  | Value | Gene Symbol | Gene Name                                  | EntrezGene          | Ensembl                         |
| 1 <input type="checkbox"/>                                                                            | ALDH1A1 | NA    | ALDH1A1     | aldehyde dehydrogenase 1 family, member A1 | <a href="#">216</a> | <a href="#">ENSG00000165092</a> |
| 2 <input type="checkbox"/>                                                                            | ALDH3A2 | NA    | ALDH3A2     | aldehyde dehydrogenase 3 family, member A2 | <a href="#">224</a> | <a href="#">ENSG00000072210</a> |

| <b>Database:cellular component      Name:extracellular region      ID:GO:0005576</b> |        |       |             |                                              |                        |                                 |
|--------------------------------------------------------------------------------------|--------|-------|-------------|----------------------------------------------|------------------------|---------------------------------|
| C=1879; O=31; E=11.04; R=2.81; rawP=3.89e-08; adjP=2.31e-06                          |        |       |             |                                              |                        |                                 |
| Index                                                                                | UserID | Value | Gene Symbol | Gene Name                                    | EntrezGene             | Ensembl                         |
| 1 <input type="checkbox"/>                                                           | DCN    | NA    | DCN         | decorin                                      | <a href="#">1634</a>   | <a href="#">ENSG00000011465</a> |
| 2 <input type="checkbox"/>                                                           | BDNF   | NA    | BDNF        | brain-derived neurotrophic factor            | <a href="#">627</a>    | <a href="#">ENSG00000176697</a> |
| 3 <input type="checkbox"/>                                                           | PSG5   | NA    | PSG5        | pregnancy specific beta-1-glycoprotein 5     | <a href="#">5673</a>   | <a href="#">ENSG00000204941</a> |
| 4 <input type="checkbox"/>                                                           | GLDN   | NA    | GLDN        | gliomedin                                    | <a href="#">342035</a> | <a href="#">ENSG00000186417</a> |
| 5 <input type="checkbox"/>                                                           | FGF2   | NA    | FGF2        | fibroblast growth factor 2 (basic)           | <a href="#">2247</a>   | <a href="#">ENSG00000138685</a> |
| 6 <input type="checkbox"/>                                                           | CREG1  | NA    | CREG1       | cellular repressor of E1A-stimulated genes 1 | <a href="#">8804</a>   | <a href="#">ENSG00000143162</a> |
| 7 <input type="checkbox"/>                                                           | APOD   | NA    | APOD        | apolipoprotein D                             | <a href="#">347</a>    | <a href="#">ENSG00000189058</a> |
| 8 <input type="checkbox"/>                                                           | MGP    | NA    | MGP         | matrix Gla protein                           | <a href="#">4256</a>   | <a href="#">ENSG00000111341</a> |
| 9 <input type="checkbox"/>                                                           | LAMC3  | NA    | LAMC3       | laminin, gamma 3                             | <a href="#">10319</a>  | <a href="#">ENSG00000050555</a> |
| 10 <input type="checkbox"/>                                                          | PSG9   | NA    | PSG9        | pregnancy specific beta-1-glycoprotein 9     | <a href="#">5678</a>   | <a href="#">ENSG00000183668</a> |
|                                                                                      |        |       |             |                                              |                        |                                 |

| <b>Database:cellular component    Name:extracellular region    ID:GO:0005576</b> |          |       |             |                                                                                               |                        |                                 |
|----------------------------------------------------------------------------------|----------|-------|-------------|-----------------------------------------------------------------------------------------------|------------------------|---------------------------------|
| C=1879; O=31; E=11.04; R=2.81; rawP=3.89e-08; adjP=2.31e-06                      |          |       |             |                                                                                               |                        |                                 |
| Index                                                                            | UserID   | Value | Gene Symbol | Gene Name                                                                                     | EntrezGene             | Ensembl                         |
| 11 <input type="checkbox"/>                                                      | SMOC2    | NA    | SMOC2       | SPARC related modular calcium binding 2                                                       | <a href="#">64094</a>  | <a href="#">ENSG00000112562</a> |
| 12 <input type="checkbox"/>                                                      | CPA4     | NA    | CPA4        | carboxypeptidase A4                                                                           | <a href="#">51200</a>  | <a href="#">ENSG00000128510</a> |
| 13 <input type="checkbox"/>                                                      | PSG3     | NA    | PSG3        | pregnancy specific beta-1-glycoprotein 3                                                      | <a href="#">5671</a>   | <a href="#">ENSG00000221826</a> |
| 14 <input type="checkbox"/>                                                      | ISG15    | NA    | ISG15       | ISG15 ubiquitin-like modifier                                                                 | <a href="#">9636</a>   | <a href="#">ENSG00000187608</a> |
| 15 <input type="checkbox"/>                                                      | PSG6     | NA    | PSG6        | pregnancy specific beta-1-glycoprotein 6                                                      | <a href="#">5675</a>   | <a href="#">ENSG00000170848</a> |
| 16 <input type="checkbox"/>                                                      | FMOD     | NA    | FMOD        | fibromodulin                                                                                  | <a href="#">2331</a>   | <a href="#">ENSG00000122176</a> |
| 17 <input type="checkbox"/>                                                      | CCL26    | NA    | CCL26       | chemokine (C-C motif) ligand 26                                                               | <a href="#">10344</a>  | <a href="#">ENSG00000006606</a> |
| 18 <input type="checkbox"/>                                                      | TGFBR3   | NA    | TGFBR3      | transforming growth factor, beta receptor III                                                 | <a href="#">7049</a>   | <a href="#">ENSG00000069702</a> |
| 19 <input type="checkbox"/>                                                      | PLAC9    | NA    | PLAC9       | placenta-specific 9                                                                           | <a href="#">219348</a> | <a href="#">ENSG00000189129</a> |
| 20 <input type="checkbox"/>                                                      | IL6      | NA    | IL6         | interleukin 6 (interferon, beta 2)                                                            | <a href="#">3569</a>   | <a href="#">ENSG00000136244</a> |
| 21 <input type="checkbox"/>                                                      | CCL8     | NA    | CCL8        | chemokine (C-C motif) ligand 8                                                                | <a href="#">6355</a>   | <a href="#">ENSG00000108700</a> |
| 22 <input type="checkbox"/>                                                      | EMILIN2  | NA    | EMILIN2     | elastin microfibril interfacier 2                                                             | <a href="#">84034</a>  | <a href="#">ENSG00000132205</a> |
| 23 <input type="checkbox"/>                                                      | SERPINE1 | NA    | SERPINE1    | serpin peptidase inhibitor, clade E (nexin, plasminogen activator inhibitor type 1), member 1 | <a href="#">5054</a>   | <a href="#">ENSG00000106366</a> |
| 24 <input type="checkbox"/>                                                      | OLFM1    | NA    | OLFM1       | olfactomedin 1                                                                                | <a href="#">10439</a>  | <a href="#">ENSG00000130558</a> |
| 25 <input type="checkbox"/>                                                      | PODN     | NA    | PODN        | podocan                                                                                       | <a href="#">127435</a> | <a href="#">ENSG00000174348</a> |
| 26 <input type="checkbox"/>                                                      | PROS1    | NA    | PROS1       | protein S (alpha)                                                                             | <a href="#">5627</a>   | <a href="#">ENSG00000184500</a> |
| 27 <input type="checkbox"/>                                                      | LAMC2    | NA    | LAMC2       | laminin, gamma 2                                                                              | <a href="#">3918</a>   | <a href="#">ENSG00000058085</a> |
| 28 <input type="checkbox"/>                                                      | DPT      | NA    | DPT         | dermatopontin                                                                                 | <a href="#">1805</a>   | <a href="#">ENSG00000143196</a> |
| 29 <input type="checkbox"/>                                                      | STC1     | NA    | STC1        | stanniocalcin 1                                                                               | <a href="#">6781</a>   | <a href="#">ENSG00000159167</a> |

| <b>Database:cellular component    Name:extracellular region    ID:GO:0005576</b> |        |       |             |                                               |                      |                                 |
|----------------------------------------------------------------------------------|--------|-------|-------------|-----------------------------------------------|----------------------|---------------------------------|
| C=1879; O=31; E=11.04; R=2.81; rawP=3.89e-08; adjP=2.31e-06                      |        |       |             |                                               |                      |                                 |
| Index                                                                            | UserID | Value | Gene Symbol | Gene Name                                     | EntrezGene           | Ensembl                         |
| 30 <input type="checkbox"/>                                                      | PCSK5  | NA    | PCSK5       | proprotein convertase subtilisin/kexin type 5 | <a href="#">5125</a> | <a href="#">ENSG00000099139</a> |
| 31 <input type="checkbox"/>                                                      | LOX    | NA    | LOX         | lysyl oxidase                                 | <a href="#">4015</a> | <a href="#">ENSG00000113083</a> |

| <b>Database:cellular component    Name:extracellular region part    ID:GO:0044421</b> |          |       |             |                                               |                        |                                 |
|---------------------------------------------------------------------------------------|----------|-------|-------------|-----------------------------------------------|------------------------|---------------------------------|
| C=1012; O=22; E=5.95; R=3.70; rawP=6.20e-08; adjP=2.31e-06                            |          |       |             |                                               |                        |                                 |
| Index                                                                                 | UserID   | Value | Gene Symbol | Gene Name                                     | EntrezGene             | Ensembl                         |
| 1 <input type="checkbox"/>                                                            | DCN      | NA    | DCN         | decorin                                       | <a href="#">1634</a>   | <a href="#">ENSG00000011465</a> |
| 2 <input type="checkbox"/>                                                            | GLDN     | NA    | GLDN        | gliomedin                                     | <a href="#">342035</a> | <a href="#">ENSG00000186417</a> |
| 3 <input type="checkbox"/>                                                            | FGF2     | NA    | FGF2        | fibroblast growth factor 2 (basic)            | <a href="#">2247</a>   | <a href="#">ENSG00000138685</a> |
| 4 <input type="checkbox"/>                                                            | APOD     | NA    | APOD        | apolipoprotein D                              | <a href="#">347</a>    | <a href="#">ENSG00000189058</a> |
| 5 <input type="checkbox"/>                                                            | MGP      | NA    | MGP         | matrix Gla protein                            | <a href="#">4256</a>   | <a href="#">ENSG00000111341</a> |
| 6 <input type="checkbox"/>                                                            | LAMC3    | NA    | LAMC3       | laminin, gamma 3                              | <a href="#">10319</a>  | <a href="#">ENSG00000050555</a> |
| 7 <input type="checkbox"/>                                                            | SMOC2    | NA    | SMOC2       | SPARC related modular calcium binding 2       | <a href="#">64094</a>  | <a href="#">ENSG00000112562</a> |
| 8 <input type="checkbox"/>                                                            | ISG15    | NA    | ISG15       | ISG15 ubiquitin-like modifier                 | <a href="#">9636</a>   | <a href="#">ENSG00000187608</a> |
| 9 <input type="checkbox"/>                                                            | FMOD     | NA    | FMOD        | fibromodulin                                  | <a href="#">2331</a>   | <a href="#">ENSG00000122176</a> |
| 10 <input type="checkbox"/>                                                           | CCL26    | NA    | CCL26       | chemokine (C-C motif) ligand 26               | <a href="#">10344</a>  | <a href="#">ENSG00000006606</a> |
| 11 <input type="checkbox"/>                                                           | TGFBR3   | NA    | TGFBR3      | transforming growth factor, beta receptor III | <a href="#">7049</a>   | <a href="#">ENSG00000069702</a> |
| 12 <input type="checkbox"/>                                                           | IL6      | NA    | IL6         | interleukin 6 (interferon, beta 2)            | <a href="#">3569</a>   | <a href="#">ENSG00000136244</a> |
| 13 <input type="checkbox"/>                                                           | CCL8     | NA    | CCL8        | chemokine (C-C motif) ligand 8                | <a href="#">6355</a>   | <a href="#">ENSG00000108700</a> |
| 14 <input type="checkbox"/>                                                           | EMILIN2  | NA    | EMILIN2     | elastin microfibril interfacier 2             | <a href="#">84034</a>  | <a href="#">ENSG00000132205</a> |
| 15 <input type="checkbox"/>                                                           | OLFM1    | NA    | OLFM1       | olfactomedin 1                                | <a href="#">10439</a>  | <a href="#">ENSG00000130558</a> |
| 16 <input type="checkbox"/>                                                           | SERPINE1 | NA    | SERPINE1    | serpin peptidase inhibitor, clade E (nexin,   | <a href="#">5054</a>   | <a href="#">ENSG00000106366</a> |

| <b>Database:cellular component    Name:extracellular region part    ID:GO:0044421</b> |        |       |             |                                                   |                        |                                 |
|---------------------------------------------------------------------------------------|--------|-------|-------------|---------------------------------------------------|------------------------|---------------------------------|
| C=1012; O=22; E=5.95; R=3.70; rawP=6.20e-08; adjP=2.31e-06                            |        |       |             |                                                   |                        |                                 |
| Index                                                                                 | UserID | Value | Gene Symbol | Gene Name                                         | EntrezGene             | Ensembl                         |
|                                                                                       |        |       |             | plasminogen activator inhibitor type 1), member 1 |                        |                                 |
| 17 <input type="checkbox"/>                                                           | PODN   | NA    | PODN        | podocan                                           | <a href="#">127435</a> | <a href="#">ENSG00000174348</a> |
| 18 <input type="checkbox"/>                                                           | STC1   | NA    | STC1        | stanniocalcin 1                                   | <a href="#">6781</a>   | <a href="#">ENSG00000159167</a> |
| 19 <input type="checkbox"/>                                                           | DPT    | NA    | DPT         | dermatopontin                                     | <a href="#">1805</a>   | <a href="#">ENSG00000143196</a> |
| 20 <input type="checkbox"/>                                                           | LAMC2  | NA    | LAMC2       | laminin, gamma 2                                  | <a href="#">3918</a>   | <a href="#">ENSG00000058085</a> |
| 21 <input type="checkbox"/>                                                           | LOX    | NA    | LOX         | lysyl oxidase                                     | <a href="#">4015</a>   | <a href="#">ENSG00000113083</a> |
| 22 <input type="checkbox"/>                                                           | PCSK5  | NA    | PCSK5       | proprotein convertase subtilisin/kexin type 5     | <a href="#">5125</a>   | <a href="#">ENSG00000099139</a> |

| <b>Database:cellular component    Name:extracellular matrix    ID:GO:0031012</b> |          |       |             |                                                                                               |                        |                                 |
|----------------------------------------------------------------------------------|----------|-------|-------------|-----------------------------------------------------------------------------------------------|------------------------|---------------------------------|
| C=389; O=14; E=2.29; R=6.12; rawP=5.77e-08; adjP=2.31e-06                        |          |       |             |                                                                                               |                        |                                 |
| Index                                                                            | UserID   | Value | Gene Symbol | Gene Name                                                                                     | EntrezGene             | Ensembl                         |
| 1 <input type="checkbox"/>                                                       | DCN      | NA    | DCN         | decorin                                                                                       | <a href="#">1634</a>   | <a href="#">ENSG00000011465</a> |
| 2 <input type="checkbox"/>                                                       | FMOD     | NA    | FMOD        | fibromodulin                                                                                  | <a href="#">2331</a>   | <a href="#">ENSG00000122176</a> |
| 3 <input type="checkbox"/>                                                       | GLDN     | NA    | GLDN        | gliomedin                                                                                     | <a href="#">342035</a> | <a href="#">ENSG00000186417</a> |
| 4 <input type="checkbox"/>                                                       | TGFBR3   | NA    | TGFBR3      | transforming growth factor, beta receptor III                                                 | <a href="#">7049</a>   | <a href="#">ENSG00000069702</a> |
| 5 <input type="checkbox"/>                                                       | MGP      | NA    | MGP         | matrix Gla protein                                                                            | <a href="#">4256</a>   | <a href="#">ENSG00000111341</a> |
| 6 <input type="checkbox"/>                                                       | EMILIN2  | NA    | EMILIN2     | elastin microfibril interfacier 2                                                             | <a href="#">84034</a>  | <a href="#">ENSG00000132205</a> |
| 7 <input type="checkbox"/>                                                       | CRIP2    | NA    | CRIP2       | cysteine-rich protein 2                                                                       | <a href="#">1397</a>   | <a href="#">ENSG00000182809</a> |
| 8 <input type="checkbox"/>                                                       | LAMC3    | NA    | LAMC3       | laminin, gamma 3                                                                              | <a href="#">10319</a>  | <a href="#">ENSG00000050555</a> |
| 9 <input type="checkbox"/>                                                       | SERPINE1 | NA    | SERPINE1    | serpin peptidase inhibitor, clade E (nexin, plasminogen activator inhibitor type 1), member 1 | <a href="#">5054</a>   | <a href="#">ENSG00000106366</a> |
| 10 <input type="checkbox"/>                                                      | PODN     | NA    | PODN        | podocan                                                                                       | <a href="#">127435</a> | <a href="#">ENSG00000174348</a> |
| 11 <input type="checkbox"/>                                                      | SMOC2    | NA    | SMOC2       |                                                                                               | <a href="#">64094</a>  | <a href="#">ENSG00000112562</a> |

| <b>Database:cellular component      Name:extracellular matrix      ID:GO:0031012</b> |        |       |             |                                         |                      |                                 |
|--------------------------------------------------------------------------------------|--------|-------|-------------|-----------------------------------------|----------------------|---------------------------------|
| C=389; O=14; E=2.29; R=6.12; rawP=5.77e-08; adjP=2.31e-06                            |        |       |             |                                         |                      |                                 |
| Index                                                                                | UserID | Value | Gene Symbol | Gene Name                               | EntrezGene           | Ensembl                         |
|                                                                                      |        |       |             | SPARC related modular calcium binding 2 |                      |                                 |
| 12 <input type="checkbox"/>                                                          | LAMC2  | NA    | LAMC2       | laminin, gamma 2                        | <a href="#">3918</a> | <a href="#">ENSG00000058085</a> |
| 13 <input type="checkbox"/>                                                          | DPT    | NA    | DPT         | dermatopontin                           | <a href="#">1805</a> | <a href="#">ENSG00000143196</a> |
| 14 <input type="checkbox"/>                                                          | LOX    | NA    | LOX         | lysyl oxidase                           | <a href="#">4015</a> | <a href="#">ENSG00000113083</a> |

| <b>Database:cellular component      Name:extracellular space      ID:GO:0005615</b> |          |       |             |                                                                                               |                        |                                 |
|-------------------------------------------------------------------------------------|----------|-------|-------------|-----------------------------------------------------------------------------------------------|------------------------|---------------------------------|
| C=791; O=19; E=4.65; R=4.09; rawP=1.27e-07; adjP=3.56e-06                           |          |       |             |                                                                                               |                        |                                 |
| Index                                                                               | UserID   | Value | Gene Symbol | Gene Name                                                                                     | EntrezGene             | Ensembl                         |
| 1 <input type="checkbox"/>                                                          | DCN      | NA    | DCN         | decorin                                                                                       | <a href="#">1634</a>   | <a href="#">ENSG00000011465</a> |
| 2 <input type="checkbox"/>                                                          | GLDN     | NA    | GLDN        | gliomedin                                                                                     | <a href="#">342035</a> | <a href="#">ENSG00000186417</a> |
| 3 <input type="checkbox"/>                                                          | FGF2     | NA    | FGF2        | fibroblast growth factor 2 (basic)                                                            | <a href="#">2247</a>   | <a href="#">ENSG00000138685</a> |
| 4 <input type="checkbox"/>                                                          | APOD     | NA    | APOD        | apolipoprotein D                                                                              | <a href="#">347</a>    | <a href="#">ENSG00000189058</a> |
| 5 <input type="checkbox"/>                                                          | MGP      | NA    | MGP         | matrix Gla protein                                                                            | <a href="#">4256</a>   | <a href="#">ENSG00000111341</a> |
| 6 <input type="checkbox"/>                                                          | ISG15    | NA    | ISG15       | ISG15 ubiquitin-like modifier                                                                 | <a href="#">9636</a>   | <a href="#">ENSG00000187608</a> |
| 7 <input type="checkbox"/>                                                          | FMOD     | NA    | FMOD        | fibromodulin                                                                                  | <a href="#">2331</a>   | <a href="#">ENSG00000122176</a> |
| 8 <input type="checkbox"/>                                                          | CCL26    | NA    | CCL26       | chemokine (C-C motif) ligand 26                                                               | <a href="#">10344</a>  | <a href="#">ENSG00000006606</a> |
| 9 <input type="checkbox"/>                                                          | TGFBR3   | NA    | TGFBR3      | transforming growth factor, beta receptor III                                                 | <a href="#">7049</a>   | <a href="#">ENSG00000069702</a> |
| 10 <input type="checkbox"/>                                                         | IL6      | NA    | IL6         | interleukin 6 (interferon, beta 2)                                                            | <a href="#">3569</a>   | <a href="#">ENSG00000136244</a> |
| 11 <input type="checkbox"/>                                                         | CCL8     | NA    | CCL8        | chemokine (C-C motif) ligand 8                                                                | <a href="#">6355</a>   | <a href="#">ENSG00000108700</a> |
| 12 <input type="checkbox"/>                                                         | OLFM1    | NA    | OLFM1       | olfactomedin 1                                                                                | <a href="#">10439</a>  | <a href="#">ENSG00000130558</a> |
| 13 <input type="checkbox"/>                                                         | SERPINE1 | NA    | SERPINE1    | serpin peptidase inhibitor, clade E (nexin, plasminogen activator inhibitor type 1), member 1 | <a href="#">5054</a>   | <a href="#">ENSG00000106366</a> |
| 14 <input type="checkbox"/>                                                         | PODN     | NA    | PODN        | podocan                                                                                       | <a href="#">127435</a> | <a href="#">ENSG00000174348</a> |

| <b>Database:cellular component      Name:extracellular space      ID:GO:0005615</b> |        |       |             |                                               |                      |                                 |
|-------------------------------------------------------------------------------------|--------|-------|-------------|-----------------------------------------------|----------------------|---------------------------------|
| C=791; O=19; E=4.65; R=4.09; rawP=1.27e-07; adjP=3.56e-06                           |        |       |             |                                               |                      |                                 |
| Index                                                                               | UserID | Value | Gene Symbol | Gene Name                                     | EntrezGene           | Ensembl                         |
| 15 <input type="checkbox"/>                                                         | STC1   | NA    | STC1        | stanniocalcin 1                               | <a href="#">6781</a> | <a href="#">ENSG00000159167</a> |
| 16 <input type="checkbox"/>                                                         | DPT    | NA    | DPT         | dermatopontin                                 | <a href="#">1805</a> | <a href="#">ENSG00000143196</a> |
| 17 <input type="checkbox"/>                                                         | LAMC2  | NA    | LAMC2       | laminin, gamma 2                              | <a href="#">3918</a> | <a href="#">ENSG00000058085</a> |
| 18 <input type="checkbox"/>                                                         | LOX    | NA    | LOX         | lysyl oxidase                                 | <a href="#">4015</a> | <a href="#">ENSG00000113083</a> |
| 19 <input type="checkbox"/>                                                         | PCSK5  | NA    | PCSK5       | proprotein convertase subtilisin/kexin type 5 | <a href="#">5125</a> | <a href="#">ENSG00000099139</a> |

| <b>Database:cellular component      Name:proteinaceous extracellular matrix      ID:GO:0005578</b> |         |       |             |                                               |                        |                                 |
|----------------------------------------------------------------------------------------------------|---------|-------|-------------|-----------------------------------------------|------------------------|---------------------------------|
| C=333; O=12; E=1.96; R=6.13; rawP=5.49e-07; adjP=1.23e-05                                          |         |       |             |                                               |                        |                                 |
| Index                                                                                              | UserID  | Value | Gene Symbol | Gene Name                                     | EntrezGene             | Ensembl                         |
| 1 <input type="checkbox"/>                                                                         | DCN     | NA    | DCN         | decorin                                       | <a href="#">1634</a>   | <a href="#">ENSG00000011465</a> |
| 2 <input type="checkbox"/>                                                                         | FMOD    | NA    | FMOD        | fibromodulin                                  | <a href="#">2331</a>   | <a href="#">ENSG00000122176</a> |
| 3 <input type="checkbox"/>                                                                         | GLDN    | NA    | GLDN        | gliomedin                                     | <a href="#">342035</a> | <a href="#">ENSG00000186417</a> |
| 4 <input type="checkbox"/>                                                                         | TGFBR3  | NA    | TGFBR3      | transforming growth factor, beta receptor III | <a href="#">7049</a>   | <a href="#">ENSG00000069702</a> |
| 5 <input type="checkbox"/>                                                                         | MGP     | NA    | MGP         | matrix Gla protein                            | <a href="#">4256</a>   | <a href="#">ENSG00000111341</a> |
| 6 <input type="checkbox"/>                                                                         | EMILIN2 | NA    | EMILIN2     | elastin microfibril interfacier 2             | <a href="#">84034</a>  | <a href="#">ENSG00000132205</a> |
| 7 <input type="checkbox"/>                                                                         | LAMC3   | NA    | LAMC3       | laminin, gamma 3                              | <a href="#">10319</a>  | <a href="#">ENSG00000050555</a> |
| 8 <input type="checkbox"/>                                                                         | PODN    | NA    | PODN        | podocan                                       | <a href="#">127435</a> | <a href="#">ENSG00000174348</a> |
| 9 <input type="checkbox"/>                                                                         | SMOC2   | NA    | SMOC2       | SPARC related modular calcium binding 2       | <a href="#">64094</a>  | <a href="#">ENSG00000112562</a> |
| 10 <input type="checkbox"/>                                                                        | LAMC2   | NA    | LAMC2       | laminin, gamma 2                              | <a href="#">3918</a>   | <a href="#">ENSG00000058085</a> |
| 11 <input type="checkbox"/>                                                                        | DPT     | NA    | DPT         | dermatopontin                                 | <a href="#">1805</a>   | <a href="#">ENSG00000143196</a> |
| 12 <input type="checkbox"/>                                                                        | LOX     | NA    | LOX         | lysyl oxidase                                 | <a href="#">4015</a>   | <a href="#">ENSG00000113083</a> |

| <b>Database:cellular component      Name:extracellular matrix part      ID:GO:0044420</b> |        |       |             |           |            |         |
|-------------------------------------------------------------------------------------------|--------|-------|-------------|-----------|------------|---------|
| C=166; O=7; E=0.98; R=7.18; rawP=5.44e-05; adjP=0.0010                                    |        |       |             |           |            |         |
| Index                                                                                     | UserID | Value | Gene Symbol | Gene Name | EntrezGene | Ensembl |



| <b>Database:cellular component      Name:extracellular matrix part      ID:GO:0044420</b> |         |       |             |                                         |                        |                                 |
|-------------------------------------------------------------------------------------------|---------|-------|-------------|-----------------------------------------|------------------------|---------------------------------|
| C=166; O=7; E=0.98; R=7.18; rawP=5.44e-05; adjP=0.0010                                    |         |       |             |                                         |                        |                                 |
| Index                                                                                     | UserID  | Value | Gene Symbol | Gene Name                               | EntrezGene             | Ensembl                         |
| 1 <input type="checkbox"/>                                                                | LAMC3   | NA    | LAMC3       | laminin, gamma 3                        | <a href="#">10319</a>  | <a href="#">ENSG00000050555</a> |
| 2 <input type="checkbox"/>                                                                | DCN     | NA    | DCN         | decorin                                 | <a href="#">1634</a>   | <a href="#">ENSG00000011465</a> |
| 3 <input type="checkbox"/>                                                                | GLDN    | NA    | GLDN        | gliomedin                               | <a href="#">342035</a> | <a href="#">ENSG00000186417</a> |
| 4 <input type="checkbox"/>                                                                | SMOC2   | NA    | SMOC2       | SPARC related modular calcium binding 2 | <a href="#">64094</a>  | <a href="#">ENSG00000112562</a> |
| 5 <input type="checkbox"/>                                                                | LAMC2   | NA    | LAMC2       | laminin, gamma 2                        | <a href="#">3918</a>   | <a href="#">ENSG00000058085</a> |
| 6 <input type="checkbox"/>                                                                | EMILIN2 | NA    | EMILIN2     | elastin microfibril interfacier 2       | <a href="#">84034</a>  | <a href="#">ENSG00000132205</a> |
| 7 <input type="checkbox"/>                                                                | LOX     | NA    | LOX         | lysyl oxidase                           | <a href="#">4015</a>   | <a href="#">ENSG00000113083</a> |

| <b>Database:cellular component      Name:filopodium      ID:GO:0030175</b> |        |       |             |                                                                 |                       |                                 |
|----------------------------------------------------------------------------|--------|-------|-------------|-----------------------------------------------------------------|-----------------------|---------------------------------|
| C=49; O=4; E=0.29; R=13.89; rawP=0.0002; adjP=0.0032                       |        |       |             |                                                                 |                       |                                 |
| Index                                                                      | UserID | Value | Gene Symbol | Gene Name                                                       | EntrezGene            | Ensembl                         |
| 1 <input type="checkbox"/>                                                 | EZR    | NA    | EZR         | ezrin                                                           | <a href="#">7430</a>  | <a href="#">ENSG00000092820</a> |
| 2 <input type="checkbox"/>                                                 | PALM   | NA    | PALM        | paralemmmin                                                     | <a href="#">5064</a>  | <a href="#">ENSG00000099864</a> |
| 3 <input type="checkbox"/>                                                 | MYO10  | NA    | MYO10       | myosin X                                                        | <a href="#">4651</a>  | <a href="#">ENSG00000145555</a> |
| 4 <input type="checkbox"/>                                                 | RAPH1  | NA    | RAPH1       | Ras association (RalGDS/AF-6) and pleckstrin homology domains 1 | <a href="#">65059</a> | <a href="#">ENSG00000173166</a> |

| <b>Database:cellular component      Name:Golgi lumen      ID:GO:0005796</b> |        |       |             |                                               |                      |                                 |
|-----------------------------------------------------------------------------|--------|-------|-------------|-----------------------------------------------|----------------------|---------------------------------|
| C=67; O=4; E=0.39; R=10.16; rawP=0.0006; adjP=0.0084                        |        |       |             |                                               |                      |                                 |
| Index                                                                       | UserID | Value | Gene Symbol | Gene Name                                     | EntrezGene           | Ensembl                         |
| 1 <input type="checkbox"/>                                                  | DCN    | NA    | DCN         | decorin                                       | <a href="#">1634</a> | <a href="#">ENSG00000011465</a> |
| 2 <input type="checkbox"/>                                                  | FMOD   | NA    | FMOD        | fibromodulin                                  | <a href="#">2331</a> | <a href="#">ENSG00000122176</a> |
| 3 <input type="checkbox"/>                                                  | PROS1  | NA    | PROS1       | protein S (alpha)                             | <a href="#">5627</a> | <a href="#">ENSG00000184500</a> |
| 4 <input type="checkbox"/>                                                  | PCSK5  | NA    | PCSK5       | proprotein convertase subtilisin/kexin type 5 | <a href="#">5125</a> | <a href="#">ENSG00000099139</a> |

| <b>Database:cellular component    Name:collagen    ID:GO:0005581</b> |         |       |             |                                   |                        |                                 |
|----------------------------------------------------------------------|---------|-------|-------------|-----------------------------------|------------------------|---------------------------------|
| C=81; O=4; E=0.48; R=8.40; rawP=0.0013; adjP=0.0162                  |         |       |             |                                   |                        |                                 |
| Index                                                                | UserID  | Value | Gene Symbol | Gene Name                         | EntrezGene             | Ensembl                         |
| 1 <input type="checkbox"/>                                           | DCN     | NA    | DCN         | decorin                           | <a href="#">1634</a>   | <a href="#">ENSG00000011465</a> |
| 2 <input type="checkbox"/>                                           | GLDN    | NA    | GLDN        | gliomedin                         | <a href="#">342035</a> | <a href="#">ENSG00000186417</a> |
| 3 <input type="checkbox"/>                                           | EMILIN2 | NA    | EMILIN2     | elastin microfibril interfacier 2 | <a href="#">84034</a>  | <a href="#">ENSG00000132205</a> |
| 4 <input type="checkbox"/>                                           | LOX     | NA    | LOX         | lysyl oxidase                     | <a href="#">4015</a>   | <a href="#">ENSG00000113083</a> |

| <b>Database:cellular component    Name:filopodium membrane    ID:GO:0031527</b> |        |       |             |            |                      |                                 |
|---------------------------------------------------------------------------------|--------|-------|-------------|------------|----------------------|---------------------------------|
| C=12; O=2; E=0.07; R=28.36; rawP=0.0022; adjP=0.0246                            |        |       |             |            |                      |                                 |
| Index                                                                           | UserID | Value | Gene Symbol | Gene Name  | EntrezGene           | Ensembl                         |
| 1 <input type="checkbox"/>                                                      | PALM   | NA    | PALM        | paralemmin | <a href="#">5064</a> | <a href="#">ENSG00000099864</a> |
| 2 <input type="checkbox"/>                                                      | MYO10  | NA    | MYO10       | myosin X   | <a href="#">4651</a> | <a href="#">ENSG00000145555</a> |

---

WebGestalt is currently developed and maintained by Jing Wang and Bing Zhang at the [Zhang Lab](#). Other people who have made significant contribution to the project include Dexter Duncan, Stefan Kirov, Zhiao Shi, and Jay Snoddy.

**Funding credits:** NIH/NIAAA (U01 AA016662, U01 AA013512); NIH/NIDA (P01 DA015027); NIH/NIMH (P50 MH078028, P50 MH096972); NIH/NCI (U24 CA159988); NIH/NIGMS (R01 GM088822).
