# Supplementary material
Source: PubMed Central journal article supplement (PMC4614909)
Supplement: i1552-5783-56-11-6747-s02.pdf [file i1552-5783-56-11-6747-s02.pdf]

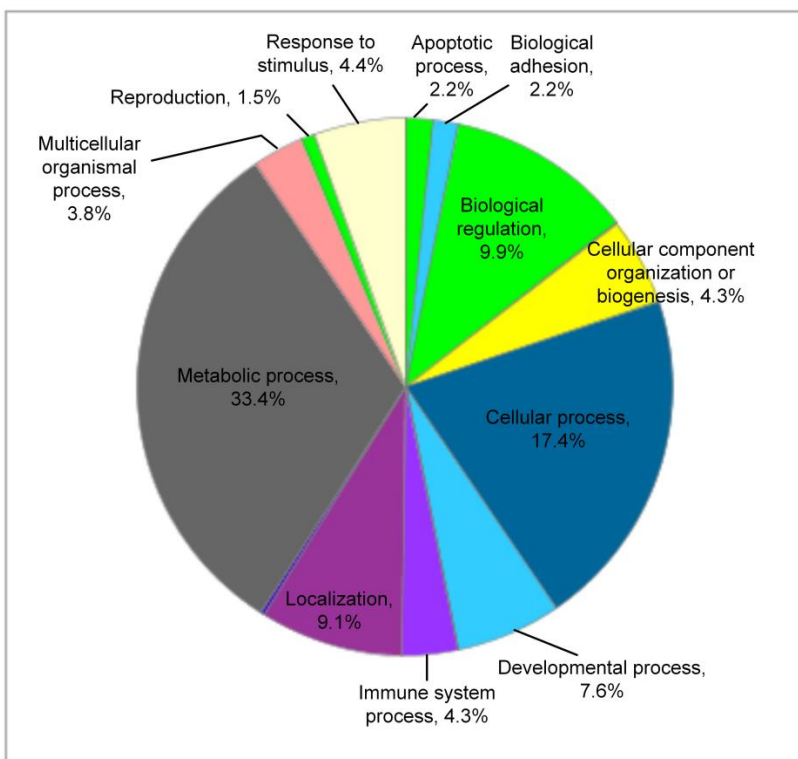

1A

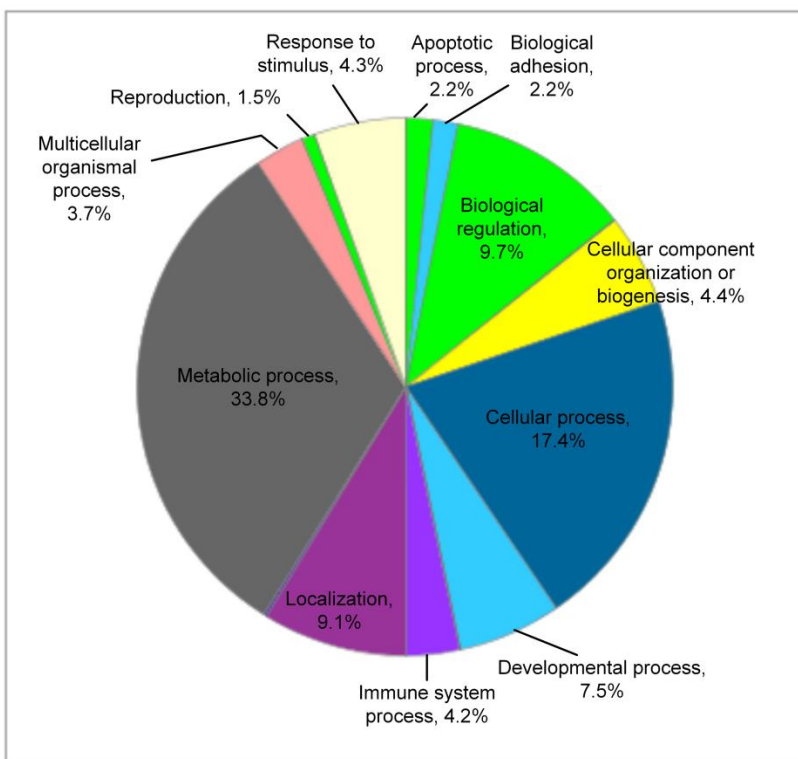

1B

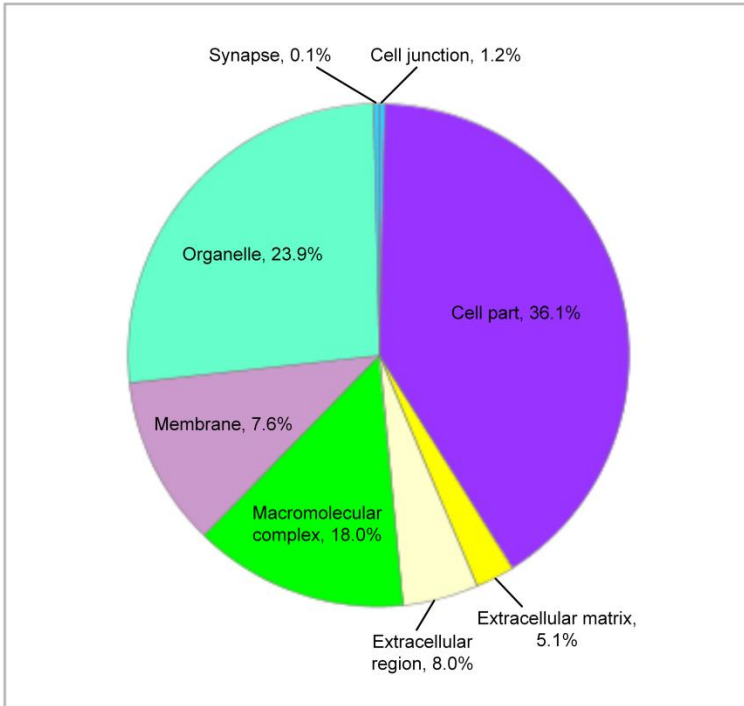

1C

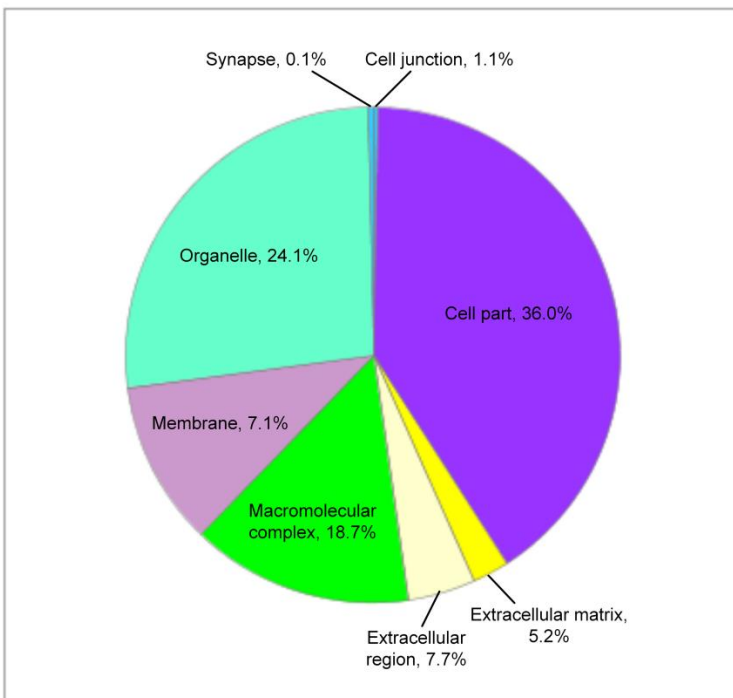

1D

**Supplemental Figure 1.** Gene ontology analysis using PANTHER for all highly expressed genes (detection p value < 0.012) in non-glaucoma control or glaucoma cases, using Illumina BeadChip data. A) Biological process in controls; B) Biological process in cases; C) Cellular component in controls; D) Cellular component in cases.

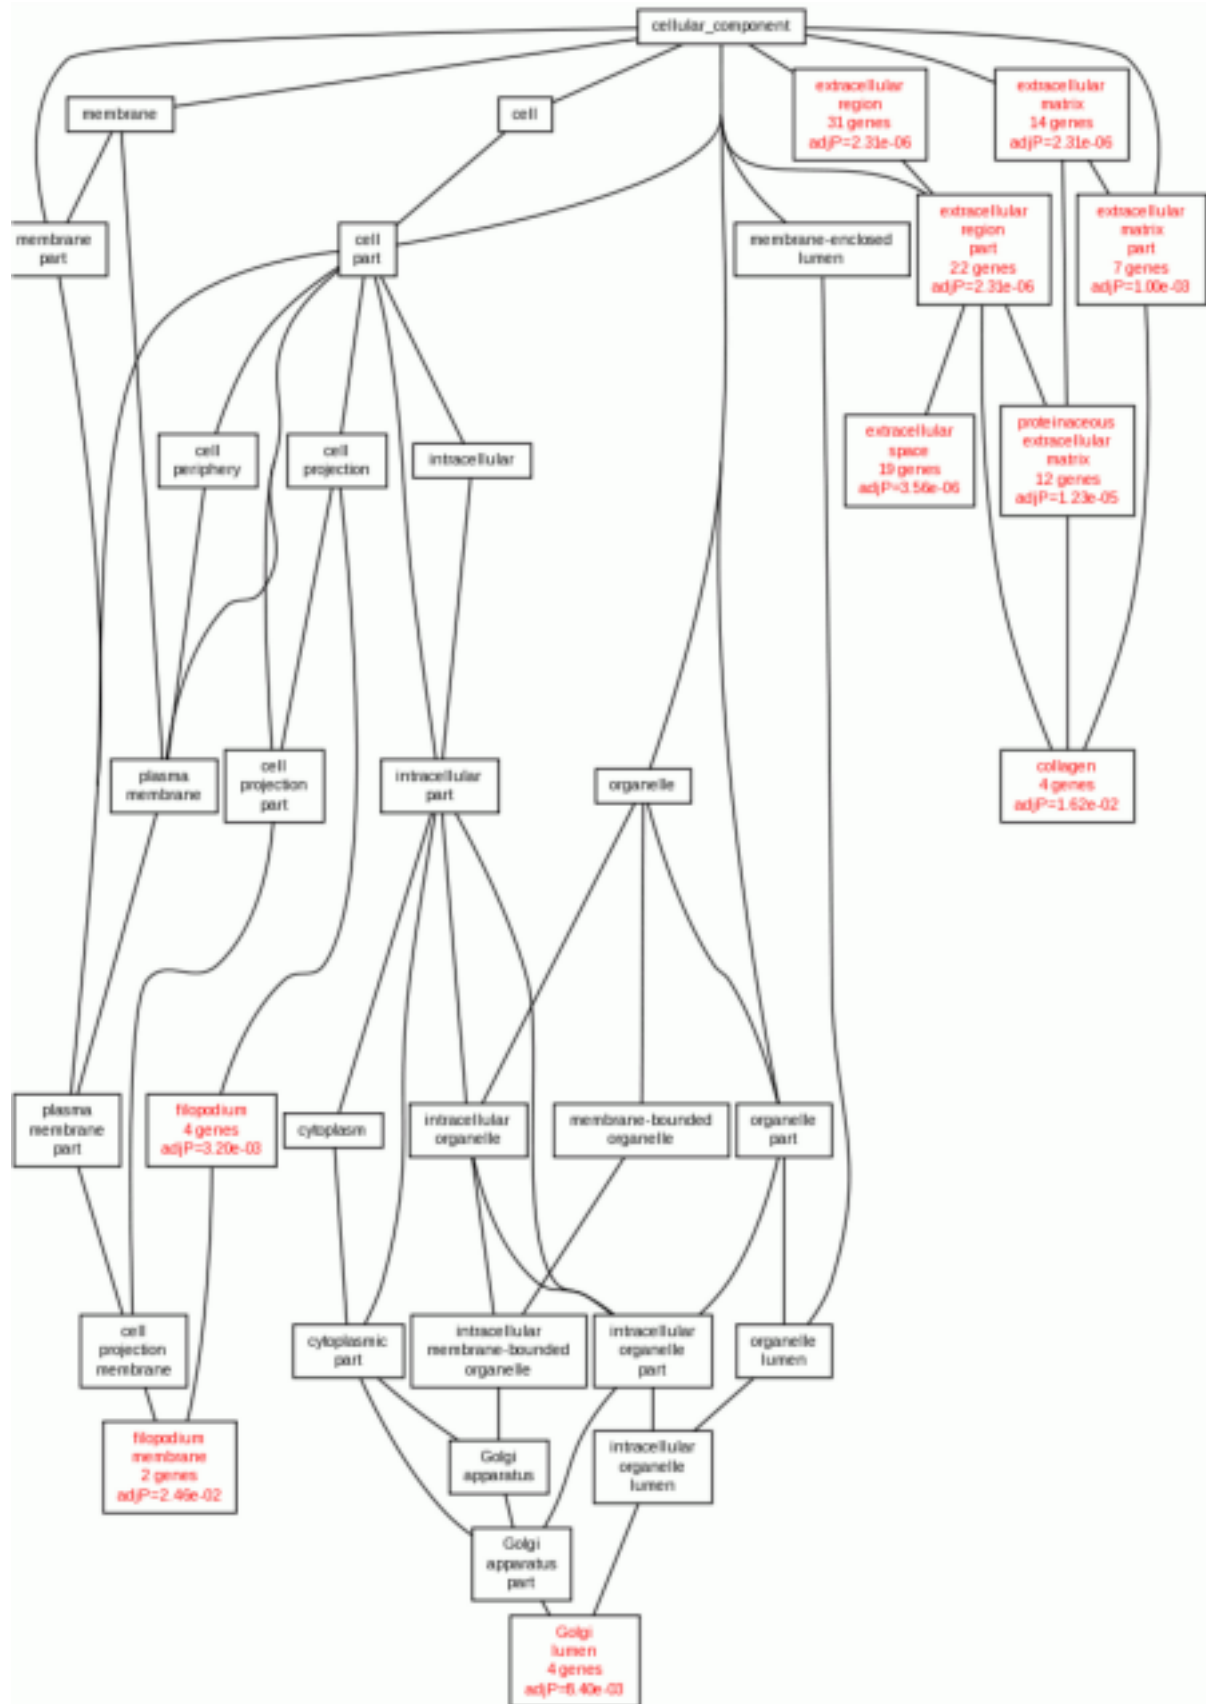

2A

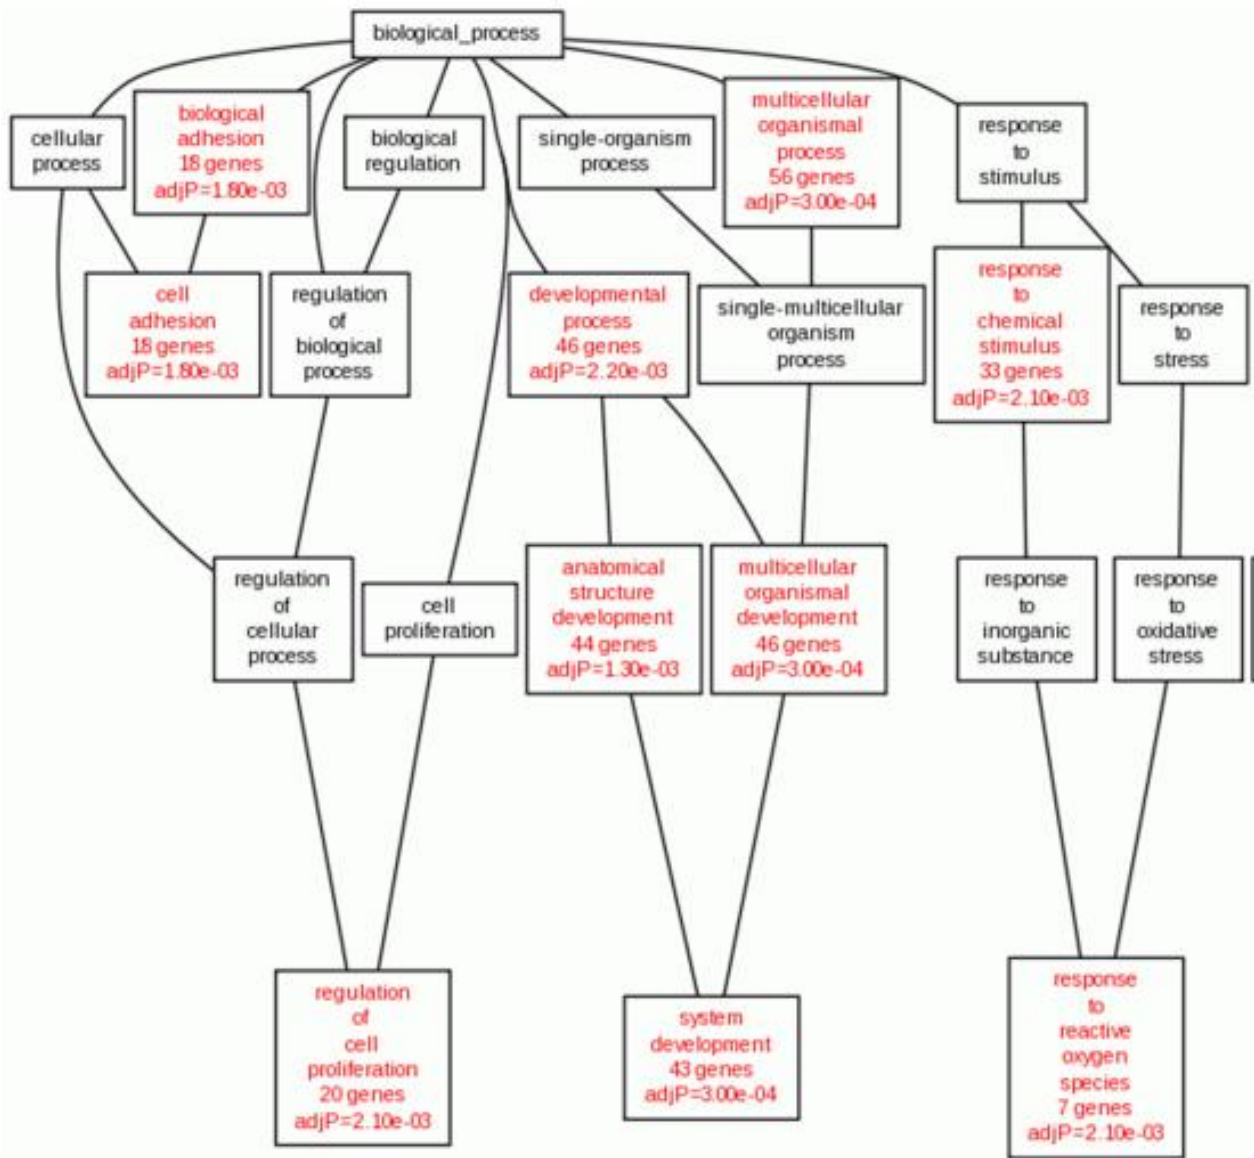

2B

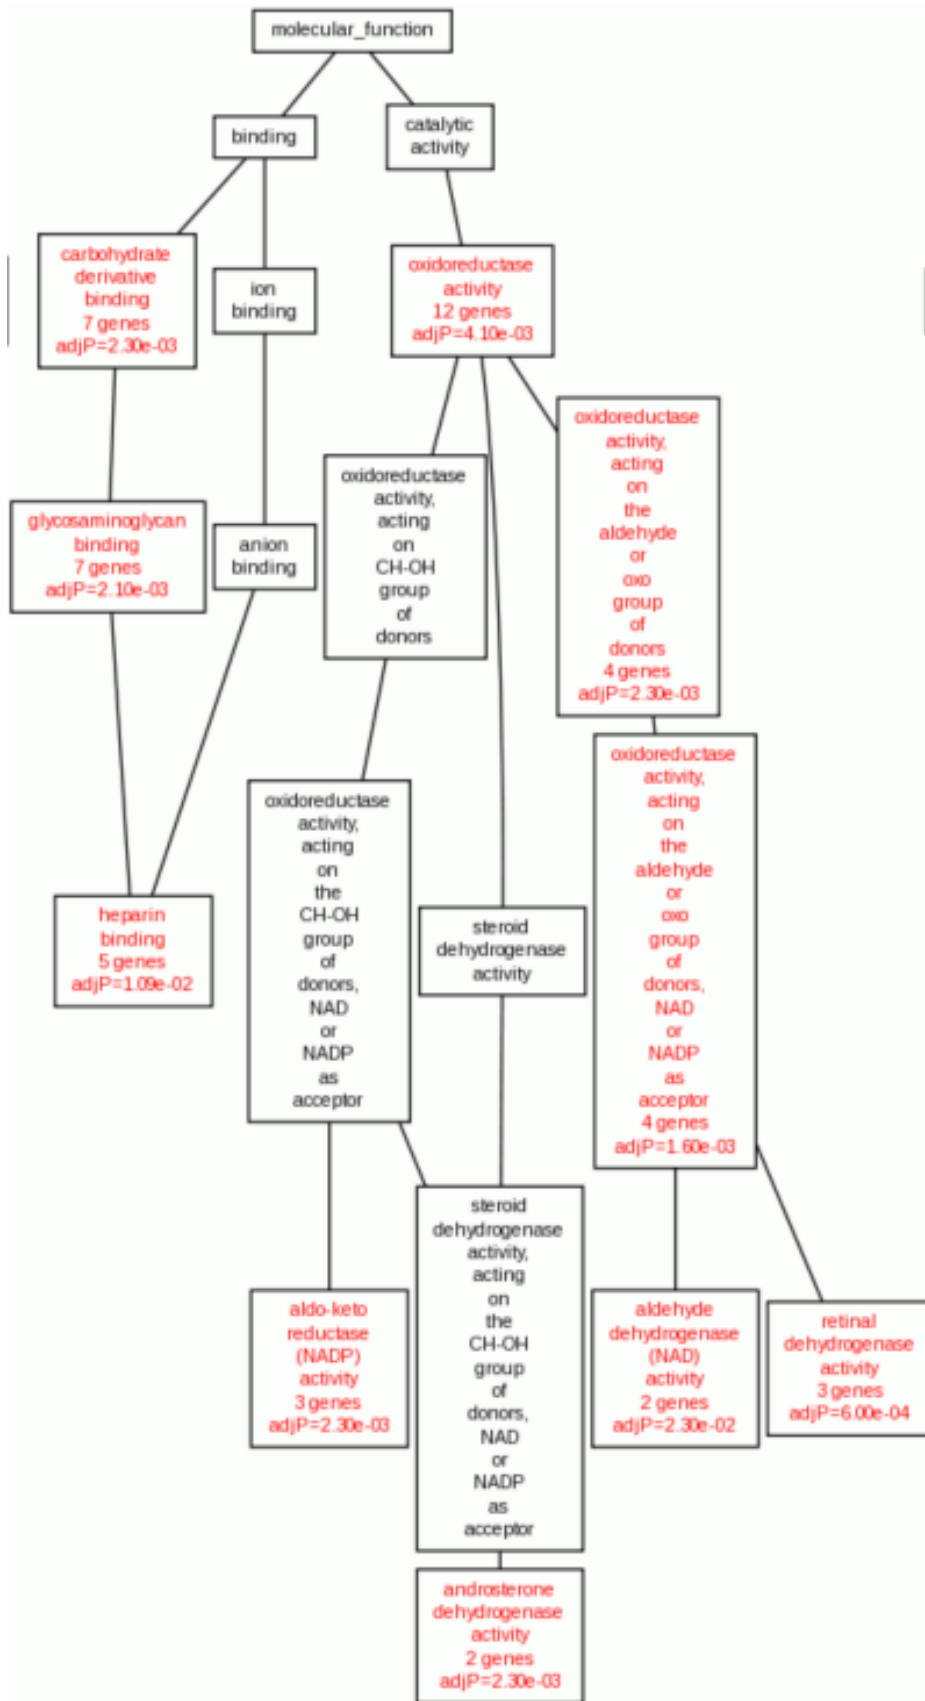

2C

**Supplemental Figure 2.** Pathway analysis of differentially expressed genes in glaucomatous SC endothelial cells using WebGestalt (web-based gene set analysis toolkit) in terms of cellular component (A), biological process (B), and molecular function (C). Red color indicates the significant enrichment while black color represents the lack of significance.

**Supplemental Table 1.** List of differentially expressed genes between glaucoma and non-glaucoma control SC endothelial cells with fold change (FC) of 2 and p value < 0.05.

| <b>ProbelID</b> | <b>TargetID</b>  | <b>DEFINITION</b>                                                                                                                                                       | <b>FC</b> | <b>P Value</b> |
|-----------------|------------------|-------------------------------------------------------------------------------------------------------------------------------------------------------------------------|-----------|----------------|
| 6900209         | <i>ADAM19</i>    | ADAM metallopeptidase domain 19 (meltrin beta)                                                                                                                          | 5.06      | 0.022          |
| 5340129         | <i>AKR1C2</i>    | aldo-keto reductase family 1, member C2 (dihydrodiol dehydrogenase 2; bile acid binding protein; 3-alpha hydroxysteroid dehydrogenase, type III) , transcript variant 1 | -3.23     | 0.018          |
| 7210632         | <i>AKR1C3</i>    | aldo-keto reductase family 1, member C3 (3-alpha hydroxysteroid dehydrogenase, type II)                                                                                 | -2.50     | 0.001          |
| 3120598         | <i>AKR1C4</i>    | aldo-keto reductase family 1, member C4 (chlordecone reductase; 3-alpha hydroxysteroid dehydrogenase, type I; dihydrodiol dehydrogenase 4)                              | -2.78     | 0.047          |
| 1070477         | <i>ALDH1A1</i>   | aldehyde dehydrogenase 1 family, member A1                                                                                                                              | -2.63     | 0.019          |
| 3120196         | <i>ALDH3A2</i>   | aldehyde dehydrogenase 3 family, member A2, transcript variant 1                                                                                                        | -2.17     | 0.004          |
| 1500358         | <i>ANKRD29</i>   | ankyrin repeat domain 29                                                                                                                                                | -2.04     | 0.012          |
| 4590377         | <i>ANKRD35</i>   | ankyrin repeat domain 35                                                                                                                                                | -2.50     | 0.04           |
| 7150634         | <i>APOD</i>      | apolipoprotein D                                                                                                                                                        | -7.69     | 0.017          |
| 770603          | <i>BDNF</i>      | brain-derived neurotrophic factor, transcript variant 4                                                                                                                 | 2.24      | 0.041          |
| 730358          | <i>C14ORF132</i> | chromosome 14 open reading frame 132                                                                                                                                    | -2.22     | 0.02           |
| 1570341         | <i>C3ORF72</i>   | chromosome 3 open reading frame 72                                                                                                                                      | -2.70     | 0.047          |
| 150474          | <i>CA12</i>      | carbonic anhydrase XII, transcript variant 1                                                                                                                            | -3.85     | 0.014          |
| 5290026         | <i>CCDC85A</i>   | coiled-coil domain containing 85A                                                                                                                                       | 2.55      | 0.023          |
| 4280301         | <i>CCL26</i>     | chemokine (C-C motif) ligand 26                                                                                                                                         | 2.36      | 0.028          |

|         |                 |                                                                                         |       |       |
|---------|-----------------|-----------------------------------------------------------------------------------------|-------|-------|
| 6620121 | <i>CCL8</i>     | chemokine (C-C motif) ligand 8                                                          | -2.13 | 0.047 |
| 3460520 | <i>CCND2</i>    | cyclin D2                                                                               | -8.33 | 0.001 |
| 2260424 | <i>CDH10</i>    | cadherin 10, type 2 (T2-cadherin)                                                       | -3.03 | 0.015 |
| 1770593 | <i>CH25H</i>    | cholesterol 25-hydroxylase                                                              | -2.33 | 0.022 |
| 7320041 | <i>CHST15</i>   | carbohydrate (N-acetylgalactosamine 4-sulfate 6-O) sulfotransferase 15                  | 2.30  | 0.006 |
| 1850156 | <i>CLDN23</i>   | claudin 23                                                                              | -3.70 | 0.034 |
| 520682  | <i>CPA4</i>     | carboxypeptidase A4                                                                     | 6.22  | 0.027 |
| 1090497 | <i>CREG1</i>    | cellular repressor of E1A-stimulated genes 1                                            | -2.13 | 0.033 |
| 5340246 | <i>CRIP2</i>    | cysteine-rich protein 2                                                                 | 2.04  | 0.003 |
| 6110079 | <i>CRYAB</i>    | crystallin, alpha B                                                                     | -2.38 | 0.016 |
| 7100731 | <i>CYGB</i>     | cytoglobin                                                                              | -2.94 | 0.037 |
| 60132   | <i>DCBLD2</i>   | discoidin, CUB and LCCL domain containing 2                                             | 2.58  | 0.025 |
| 7650296 | <i>DCN</i>      | decorin, transcript variant C                                                           | -2.44 | 0.047 |
| 7040670 | <i>DHRS3</i>    | dehydrogenase/reductase (SDR family) member 3                                           | 2.94  | 0.018 |
| 5420528 | <i>DNAJB4</i>   | DnaJ (Hsp40) homolog, subfamily B, member 4                                             | 2.50  | 0.006 |
| 2100228 | <i>DPT</i>      | dermatopontin                                                                           | -2.04 | 0.021 |
| 1190142 | <i>EMILIN2</i>  | elastin microfibril interfacier 2                                                       | -2.63 | 0.022 |
| 7150563 | <i>ENC1</i>     | ectodermal-neural cortex (with BTB-like domain)                                         | 2.32  | 0.03  |
| 2100612 | <i>EZR</i>      | ezrin, transcript variant 1                                                             | 2.33  | 0.011 |
| 3290458 | <i>FEZ1</i>     | fasciculation and elongation protein zeta 1 (zygin I), transcript variant 1             | -2.27 | 0.023 |
| 290593  | <i>FGF2</i>     | fibroblast growth factor 2 (basic)                                                      | 2.10  | 0.042 |
| 1710484 | <i>FMOD</i>     | fibromodulin                                                                            | -2.38 | 0.01  |
| 6560458 | <i>GALNTL1</i>  | UDP-N-acetyl-alpha-D-galactosamine:polypeptide N-acetylgalactosaminyltransferase-like 1 | -2.33 | 0.02  |
| 5860402 | <i>GLDN</i>     | gliomedin                                                                               | 5.00  | 0.001 |
| 5570427 | <i>GLS</i>      | glutaminase                                                                             | 2.52  | 0.03  |
| 5690270 | <i>GPRC5A</i>   | G protein-coupled receptor, family C, group 5, member A                                 | 2.41  | 0.015 |
| 7150598 | <i>GSTM3</i>    | glutathione S-transferase M3 (brain)                                                    | -2.70 | 0.022 |
| 2970019 | <i>HIST1H4H</i> | histone cluster 1, H4h                                                                  | 2.01  | 0.014 |
| 3460097 | <i>HOXB2</i>    | homeobox B2                                                                             | 2.80  | 0.007 |



|         |                  |                                                                                                     |       |       |
|---------|------------------|-----------------------------------------------------------------------------------------------------|-------|-------|
| 360291  | <i>HS.19193</i>  | PREDICTED: hypothetical<br>LOC400043                                                                | -2.00 | 0.012 |
| 5720768 | <i>HS.407903</i> | cDNA DKFZp586B0220 (from<br>clone DKFZp586B0220)                                                    | -2.17 | 0.034 |
| 50543   | <i>HS.497591</i> | cDNA FLJ41846 fis, clone<br>NT2RI3003162                                                            | 2.08  | 0.015 |
| 6180259 | <i>HSPB8</i>     | heat shock 22kDa protein 8                                                                          | -2.63 | 0.038 |
| 670386  | <i>ID1</i>       | inhibitor of DNA binding 1,<br>dominant negative helix-loop-<br>helix protein, transcript variant 2 | 2.21  | 0.026 |
| 4040576 | <i>IL6</i>       | interleukin 6 (interferon, beta 2)                                                                  | 2.73  | 0.037 |
| 2100196 | <i>ISG15</i>     | ISG15 ubiquitin-like modifier                                                                       | 2.83  | 0.041 |
| 2970347 | <i>ITPRIP</i>    | inositol 1,4,5-triphosphate<br>receptor interacting protein                                         | 2.18  | 0.002 |
| 4810424 | <i>KCNK15</i>    | potassium channel, subfamily K,<br>member 15                                                        | -2.00 | 0.047 |
| 7550064 | <i>KCTD5</i>     | potassium channel<br>tetramerisation domain<br>containing 5                                         | 2.00  | 0.038 |
| 3850692 | <i>KLF2</i>      | Kruppel-like factor 2 (lung)                                                                        | 3.47  | 0.012 |
| 6060630 | <i>KRT19</i>     | Homo sapiens keratin 19                                                                             | 7.20  | 0.013 |
| 4390100 | <i>LAMC2</i>     | laminin, gamma 2, transcript<br>variant 1                                                           | 2.22  | 0.014 |
| 6280541 | <i>LAMC3</i>     | laminin, gamma 3                                                                                    | -2.27 | 0.012 |
| 2710064 | <i>LOC387763</i> | PREDICTED: hypothetical<br>LOC387763                                                                | -2.70 | 0.017 |
| 5050538 | <i>LOC654096</i> | PREDICTED: similar to Ovarian<br>cancer-related protein 10-2<br>(OVC10-2)                           | -2.04 | 0.005 |
| 730709  | <i>LOC730525</i> | PREDICTED: hypothetical protein<br>LOC730525                                                        | -3.57 | 0.019 |
| 3710048 | <i>LOC731895</i> | PREDICTED: similar to<br>transmembrane protein 28                                                   | 2.98  | 0.003 |
| 3940017 | <i>LOX</i>       | lysyl oxidase                                                                                       | 2.60  | 0.002 |
| 770156  | <i>LRRN4CL</i>   | LRRN4 C-terminal like                                                                               | -2.44 | 0.032 |
| 1430487 | <i>MGP</i>       | matrix Gla protein                                                                                  | -4.55 | 0.048 |
| 5080131 | <i>MGST1</i>     | microsomal glutathione S-<br>transferase 1, transcript variant<br>1a                                | -2.13 | 0.021 |
| 4670131 | <i>MYO10</i>     | myosin X                                                                                            | 2.01  | 0.018 |
| 1110632 | <i>NKX3-1</i>    | NK3 homeobox 1                                                                                      | 2.21  | 0.028 |
| 940731  | <i>NR0B1</i>     | nuclear receptor subfamily 0,<br>group B, member 1                                                  | -2.22 | 0.047 |

|         |                |                                                                                               |       |       |
|---------|----------------|-----------------------------------------------------------------------------------------------|-------|-------|
| 7050066 | <i>ODZ3</i>    | odz, odd Oz/ten-m homolog 3<br>(Drosophila)                                                   | 2.98  | 0.007 |
| 2680072 | <i>OLFM1</i>   | olfactomedin 1, transcript<br>variant 1                                                       | -2.44 | 0.017 |
| 5420452 | <i>OSR2</i>    | PREDICTED: odd-skipped related<br>2 (Drosophila)                                              | -4.76 | 0     |
| 4540682 | <i>PALM</i>    | paralemmin, transcript variant 1                                                              | -4.35 | 0.029 |
| 1740343 | <i>PCSK5</i>   | proprotein convertase<br>subtilisin/kexin type 5                                              | -2.04 | 0.039 |
| 6270768 | <i>PLAC9</i>   | placenta-specific 9                                                                           | -2.94 | 0.032 |
| 7040477 | <i>PLOD2</i>   | procollagen-lysine, 2-<br>oxoglutarate 5-dioxygenase 2,<br>transcript variant 2               | 3.59  | 0.011 |
| 6480040 | <i>PODN</i>    | podocan                                                                                       | -2.94 | 0.029 |
| 4490739 | <i>PPAP2A</i>  | phosphatidic acid phosphatase<br>type 2A, transcript variant 2                                | -2.08 | 0.011 |
| 4390754 | <i>PPL</i>     | periplakin                                                                                    | -3.03 | 0.048 |
| 6420008 | <i>PROS1</i>   | protein S (alpha)                                                                             | -2.86 | 0.029 |
| 3440095 | <i>PSG3</i>    | pregnancy specific beta-1-<br>glycoprotein 3                                                  | 4.26  | 0.007 |
| 6350471 | <i>PSG5</i>    | pregnancy specific beta-1-<br>glycoprotein 5                                                  | 6.02  | 0.001 |
| 1690095 | <i>PSG6</i>    | pregnancy specific beta-1-<br>glycoprotein 6, transcript variant<br>1                         | 3.12  | 0.005 |
| 4120243 | <i>PSG9</i>    | pregnancy specific beta-1-<br>glycoprotein 9                                                  | 3.41  | 0.006 |
| 110382  | <i>RAC2</i>    | ras-related C3 botulinum toxin<br>substrate 2 (rho family, small<br>GTP binding protein Rac2) | 3.85  | 0.003 |
| 6560592 | <i>RAET1G</i>  | retinoic acid early transcript 1G                                                             | -2.00 | 0.028 |
| 2100241 | <i>RAPH1</i>   | Ras association (RalGDS/AF-6)<br>and pleckstrin homology<br>domains 1, transcript variant 1   | 2.07  | 0.034 |
| 2340681 | <i>RARRES1</i> | retinoic acid receptor responder<br>(tazarotene induced) 1,<br>transcript variant 1           | 3.24  | 0.027 |
| 1710142 | <i>RGS4</i>    | regulator of G-protein signalling<br>4                                                        | 4.45  | 0.026 |
| 1230470 | <i>RHOU</i>    | ras homolog gene family,<br>member U                                                          | -2.13 | 0.016 |
| 4730066 | <i>SCN2A</i>   | sodium channel, voltage-gated,<br>type II, alpha subunit, transcript<br>variant 2             | -2.04 | 0.046 |

|         |                 |                                                                                                     |       |       |
|---------|-----------------|-----------------------------------------------------------------------------------------------------|-------|-------|
| 4890021 | <i>SEPT3</i>    | septin 3, transcript variant B                                                                      | -2.38 | 0.025 |
| 770408  | <i>SERPINE1</i> | serpin peptidase inhibitor, clade E (nexin, plasminogen activator inhibitor type 1), member 1       | 4.33  | 0.043 |
| 5490692 | <i>SEZ6L2</i>   | seizure related 6 homolog (mouse)-like 2, transcript variant 2                                      | 2.98  | 0.019 |
| 4390450 | <i>SGK</i>      | serum/glucocorticoid regulated kinase                                                               | 2.79  | 0.018 |
| 2030324 | <i>SGK1</i>     | serum/glucocorticoid regulated kinase 1 , transcript variant 1                                      | 2.82  | 0.012 |
| 6420731 | <i>SLC20A1</i>  | solute carrier family 20 (phosphate transporter), member 1                                          | 2.62  | 0.008 |
| 2630437 | <i>SMOC2</i>    | SPARC related modular calcium binding 2                                                             | -2.27 | 0.037 |
| 6760669 | <i>SPRY1</i>    | sprouty homolog 1, antagonist of FGF signaling (Drosophila), transcript variant 1                   | -3.85 | 0.013 |
| 2650730 | <i>STC1</i>     | stanniocalcin 1                                                                                     | -2.70 | 0.049 |
| 3140603 | <i>SVIL</i>     | supervillin, transcript variant 1                                                                   | -2.38 | 0.047 |
| 4180296 | <i>TBX18</i>    | T-box 18                                                                                            | -2.38 | 0.029 |
| 1570646 | <i>TFAP2A</i>   | transcription factor AP-2 alpha (activating enhancer binding protein 2 alpha), transcript variant 3 | 2.02  | 0.014 |
| 7650358 | <i>TGFBI</i>    | transforming growth factor, beta-induced, 68kDa                                                     | 2.02  | 0.023 |
| 3190379 | <i>TGFBR3</i>   | transforming growth factor, beta receptor III                                                       | -3.03 | 0.044 |
| 240523  | <i>TMEM166</i>  | transmembrane protein 166                                                                           | 2.42  | 0.027 |
| 2140242 | <i>TNFAIP6</i>  | tumor necrosis factor, alpha-induced protein 6 (TNFAIP6), mRNA.                                     | -2.86 | 0.023 |
| 2360672 | <i>TNFRSF19</i> | tumor necrosis factor receptor superfamily, member 19, transcript variant 2                         | -4.00 | 0.017 |
| 6660131 | <i>TSPAN13</i>  | tetraspanin 13                                                                                      | 2.22  | 0.042 |
| 2320133 | <i>TXNRD1</i>   | thioredoxin reductase 1, transcript variant 4                                                       | 2.07  | 0.004 |
| 2640369 | <i>VIL2</i>     | villin 2 (ezrin)                                                                                    | 2.24  | 0.018 |
| 4390646 | <i>ZHX2</i>     | zinc fingers and homeoboxes 2                                                                       | -2.17 | 0.04  |
| 6590026 | <i>ZNF521</i>   | zinc finger protein 521                                                                             | -2.17 | 0.009 |

**Supplemental table 2.** List of POAG-associated genes with expression changes between glaucoma and non-glaucoma control SC endothelial cells. The first five genes were selected to further examine their expression using droplet digital PCR.

| Probe ID | Gene Symbol       | Gene Description                                      | Fold Change | p value |
|----------|-------------------|-------------------------------------------------------|-------------|---------|
| 4060358  | <b>ABCA1</b>      | ATP-binding cassette, sub-family A, member 1          | -1.35       | 0.103   |
| 5550379  | <b>CAV1</b>       | caveolin 1, caveolae protein, 22kDa                   | 1.79        | 0.035   |
| 620360   | <b>CAV2</b>       | caveolin 2                                            | 1.39        | 0.037   |
| 2120053  | <b>CYP1B1</b>     | cytochrome P450, family 1, subfamily B, polypeptide 1 | -1.45       | 0.030   |
| 1070435  | <b>GAS7</b>       | growth arrest-specific 7, transcript variant c        | -1.28       | 0.222   |
| 2690187  | <i>AFAP1</i>      | actin filament-associated protein 1                   | 1.56        | 0.135   |
| 5690092  | <i>ATOH7</i>      | atonal homolog 7 (Drosophila)                         | 1.03        | 0.484   |
| 4200678  | <i>CDKN2B-AS1</i> | CDKN2B antisense RNA (non-protein coding)             | 1.00        | 0.976   |
| 6060440  | <i>FNDC3B</i>     | fibronectin type III domain containing 3B             | 1.18        | 0.273   |
| 3440491  | <i>GALC</i>       | galactosylceramidase                                  | -1.09       | 0.589   |
| 6840156  | <i>GMDS</i>       | GDP-mannose 4,6-dehydratase                           | -1.12       | 0.541   |
| 1940037  | <i>MYOC</i>       | myocilin                                              | 1.14        | 0.243   |
| 2650497  | <i>LRP12</i>      | low density lipoprotein-related protein 12            | 1.11        | 0.023   |
| 5260215  | <i>OPTN</i>       | optineurin                                            | -1.15       | 0.489   |
| 1260315  | <i>PMM2</i>       | phosphomannomutase 2                                  | 1.43        | 0.03    |
| 1450408  | <i>SIX1</i>       | SIX homeobox 1                                        | 1.03        | 0.362   |
| 4260047  | <i>SIX6</i>       | SIX homeobox 6                                        | -1.04       | 0.162   |
| 2230730  | <i>SRBD1</i>      | S1 RNA binding domain 1                               | -1.09       | 0.296   |
| 780598   | <i>TBK1</i>       | TANK-binding kinase 1                                 | -1.22       | 0.132   |
| 1470209  | <i>TMCO1</i>      | transmembrane and coiled-coil domains 1               | -1.03       | 0.734   |
| 6650100  | <i>WDR36</i>      | WD repeat domain 36                                   | 1.00        | 0.990   |
| 3170280  | <i>ZFPM2</i>      | zinc finger protein, multitype 2                      | 1.11        | 0.082   |
